# Supplementary material for: Comparative Analysis of the Glutathione S-Transferase Gene Family of Four Triticeae Species and Transcriptome Analysis of GST Genes in Common Wheat Responding to Salt Stress
Source: Int J Genomics. 2021 Feb 18;2021:6289174. doi: 10.1155/2021/6289174 (PMC7906807; doi:10.1155/2021/6289174)
Supplement: Supplementary Materials — Table S1: the GST genes of Arabidopsis thaliana and Oryza sativa. Table S2: primers used in this study. Table S3: the GST genes identified in wheat and its relatives. Table S4: the results of a BLASTN search against the Ae. tauschii genome sequence using the MAPEG gene (AT1G65820) from A. thaliana as a query. Table S5: differentially expressed GST genes at different salt concentrations. Table S6: identification of differentially expressed genes between various salt concentration treatments and the control. Table S7: identification of differentially expressed genes between various salt concentration treatments. Table S8: FPKM value of all GST genes in common wheat. Table S9: classification of DEGs under various salt concentrations. [file 6289174.f1.xlsx]

## Sheet: Table S1
Table S1: The GST genes of Arabidopsis thaliana and Oryza sativa.
Arabidopsis thaliana	Oryza sativa
AT1G02920	Os02g0814800
AT1G02930	Os12g0210200
AT1G02940	Os10g0529400
AT1G02950	Os10g0527400
AT1G10360	Os10g0529500
AT1G10370	Os01g0764000
AT1G17170	Os09g0367700
AT1G17180	Os03g0283100
AT1G17190	Os03g0785900
AT1G19550	Os10g0365200
AT1G19570	Os05g0116100
AT1G27130	Os10g0527800
AT1G27140	Os01g0933900
AT1G30230	Os10g0527601
AT1G49860	Os01g0371500
AT1G53680	Os06g0168000
AT1G59670	Os11g0245100
AT1G59700	Os03g0283000
AT1G65820	Os10g0530400
AT1G69920	Os01g0949750
AT1G69930	Os10g0543800
AT1G74590	Os10g0529700
AT1G75270	Os02g0564000
AT1G77290	Os01g0372400
AT1G78320	Os05g0412800
AT1G78340	Os10g0530500
AT1G78360	Os01g0370200
AT1G78370	Os01g0950000
AT1G78380	Os01g0371200
AT2G02380	Os10g0525500
AT2G02390	Os08g0293400
AT2G02930	Os03g0283200
AT2G29420	Os01g0692100
AT2G29440	Os01g0370900
AT2G29450	Os01g0353400
AT2G29460	Os10g0530600
AT2G29470	Os01g0692000
AT2G29480	Os01g0369700
AT2G29490	Os12g0123200
AT2G30860	Os10g0530200
AT2G30870	Os10g0395400
AT2G47730	Os11g0588300
AT3G03190	Os10g0529300
AT3G09270	Os03g0135200
AT3G43800	Os03g0595600
AT3G55040	Os01g0949700
AT3G62760	Os01g0872900
AT4G02520	Os04g0435500
AT4G19880	Os07g0152700
AT5G02780	Os01g0949800
AT5G02790	Os01g0374000
AT5G12110	Os02g0319300
AT5G16710	Os10g0531400
AT5G17220	Os05g0148900
AT5G41210	Os10g0528200
AT5G41220	Os09g0467200
AT5G41240	Os10g0528900
AT5G44000	Os06g0227500
AT5G44990	Os01g0371400
AT5G45020	Os10g0481300
AT5G62480	Os10g0528300
	Os01g0558100
	Os10g0368100
	Os10g0528400
	Os03g0134900
	Os10g0525800
	Os10g0530300
	Os01g0949900
	Os08g0550500
	Os07g0468100
	Os10g0525400
	Os10g0529800
	Os12g0210300
	Os10g0528100
	Os03g0135100
	Os07g0168300
	Os01g0950300
	Os10g0530900
	Os03g0643700
	Os03g0135300

## Sheet: Table S2
Table S2: Primers used in this study.
Gene id	Forward prime			Reverse primer
	Sequence	Identity	cds window	Sequence	Identity	cds window
TraesCS7D02G030700	GAGCTACGACTACCTCCCCG	100	27-43	GGAACAGCTTGTCGTTCACA	100	346-327
TraesCS1D02G094700	CGGTGAAGGTGTACGGGTG	100	11-29	AGCTTGGCTACGTTCTCGTC	100	419-400
TraesCS1B02G194700	CGAGTACGTCGAAGAGGACC	100	102-121	AGGGTTTCCCGTTAGAGCAG	100	460-441
TraesCS5B02G426300	TGCTGAACTTCTGGGTGAGC	100	26-45	GAAGGACTTATCCCCGAGCG	100	441-422
TraesCS1D02G081200	CTTCCAGGATGGGGATCTGC	100	171-190	GGTAGTCGTGCTTGGACAGG	100	478-459
TraesCS1B02G097400	TGCTCCGCAAGTACAAGACG	100	224-243	ATGAGCGGGTTGATGAGGC	100	377-359

## Sheet: Table S3
Table S3. The GST genes identified in wheat and its relatives.
T.aestivum (346)			T. durum (226)			T. urartu (104)			Ae. tauschii (105)
Gene	Class	Annotation	Gene	Class	Annotation	Gene	Class	Annotation	Gene	Class	Annotation
TraesCS7A02G190700	DHAR		TRITD1Av1G011410	DHAR		TuG1812G0400002375	DHAR		AET7Gv20486500	DHAR
TraesCS7D02G191700	DHAR		TRITD0Uv1G006330	DHAR		TuG1812G0100000618	DHAR		AET1Gv20108200	DHAR
TraesCS7B02G095600	DHAR		TRITD7Av1G063210	DHAR		TuG1812G0200001304	EF1B		AET2Gv20252300	EF1B
TraesCS1B02G059100	DHAR		TRITD2Bv1G045150	EF1B		TuG1812G0200001837	EF1B		AET2Gv20354000	EF1B
TraesCS1A02G045700	DHAR		TRITD2Av1G035490	EF1B		TuG1812G0400002373	Lambda		AET4Gv20515700	Lambda
TraesCS2B02G147700	EF1B		TRITD2Bv1G066560	EF1B		TuG1812G0700004905	Lambda		AET7Gv21111000	Lambda
TraesCS2D02G128300	EF1B		TRITD2Av1G055360	EF1B		TuG1812G0400002374	Lambda		AET4Gv20516000	Lambda
TraesCS2A02G125200	EF1B		TRITD4Bv1G123890	Lambda		TuG1812G0400002367	Lambda		AET4Gv20083100	MAPEG
TraesCS2D02G177300	EF1B		TRITD4Av1G048450	Lambda		TuG1812G0400000421	MAPEG		AET6Gv20942000	OMEGA	Misannotated
TraesCS2A02G169800	EF1B		TRITD4Av1G048280	Lambda		TuG1812S0002745200	MAPEG		AET6Gv20153500	OMEGA	Misannotated
TraesCS2B02G196100	EF1B		TRITD7Av1G242630	Lambda		TuG1812S0002745400	MAPEG		AET2Gv21283300	Phi	Truncated
TraesCS4A02G103900	Lambda		TRITD4Bv1G123770	Lambda		TuG1812G0600000566	OMEGA		AET5Gv20940600	Phi
TraesCS4D02G201100	Lambda		TRITD4Av1G048290	Lambda		TuG1812G0600001818	OMEGA	Truncated	AET3Gv20289000	Phi
TraesCS4B02G200000	Lambda		TRITD4Av1G048300	Lambda		TuG1812G0600000149	Phi	Truncated	AET3Gv20288900	Phi
TraesCS4D02G201200	Lambda		TRITD4Bv1G123790	Lambda		TuG1812G0400003702	Phi	Truncated	AET2Gv20894800	Phi
TraesCS4B02G200100	Lambda		TRITD4Bv1G012800	MAPEG		TuG1812G0500000294	Phi		AET5Gv20613200	Phi
TraesCS4A02G103800	Lambda		TRITD4Bv1G012790	MAPEG		TuG1812G0500000307	Phi		AET7Gv20487800	Phi
TraesCS7A02G455000	Lambda		TRITD4Av1G193630	MAPEG		TuG1812G0100001211	Phi		AET2Gv20073200	Phi
TraesCSU02G231100	Lambda		TRITD4Av1G193600	MAPEG		TuG1812G0100001218	Phi		AET6Gv20029000	Phi
TraesCS7D02G444000	Lambda	Misannotated	TRITD4Av1G193620	MAPEG		TuG1812G0100001208	Phi		AET1Gv20197500	Phi
TraesCS4D02G201300	Lambda		TRITD4Bv1G012840	MAPEG		TuG1812G0100001209	Phi		AET1Gv20231700	Phi
TraesCS4A02G103700	Lambda		TRITD6Av1G218620	OMEGA		TuG1812G0700005321	Phi		AET5Gv20079800	Phi
TraesCS4B02G199700	Lambda		TRITD6Bv1G217420	OMEGA		TuG1812G0300003496	Phi		AET1Gv20231600	Phi	Misannotated
TraesCS4A02G104300	Lambda		TRITD6Bv1G019940	OMEGA		TuG1812G0300003473	Phi		AET3Gv20707300	Phi
TraesCS4D02G200700	Lambda		TRITD6Av1G013180	OMEGA		TuG1812G0100000202	Phi		AET7Gv21199900	Phi
TraesCS4B02G044500	MAPEG		TRITD1Bv1G127600	Phi		TuG1812G0700005646	Phi		AET1Gv20033900	Phi
TraesCS4D02G042000	MAPEG		TRITD1Av1G133040	Phi		TuG1812G0700005643	Phi		AET7Gv21281300	Phi
TraesCS4A02G269600	MAPEG		TRITD4Bv1G187090	Phi		TuG1812G0300001471	Phi		AET5Gv21002200	Phi
TraesCS4D02G041800	MAPEG		TRITD4Bv1G187110	Phi		TuG1812S0000366200	Phi		AET1Gv20032200	Phi	Truncated
TraesCS4A02G269800	MAPEG		TRITD5Av1G240840	Phi		TuG1812S0001801500	Phi		AET1Gv20031800	Phi	Truncated
TraesCS4D02G041900	MAPEG		TRITD4Bv1G187100	Phi		TuG1812G0500002900	Phi		AET3Gv21003000	Phi
TraesCS4B02G044300	MAPEG		TRITD5Av1G240800	Phi		TuG1812S0000592900	Phi		AET3Gv21003600	Phi
TraesCS4B02G044400	MAPEG		TRITD3Av1G253560	Phi	Truncated	TuG1812G0100002420	Phi		AET3Gv21003100	Phi
TraesCS4A02G269700	MAPEG		TRITD3Bv1G247010	Phi		TuG1812G0500003674	Phi		AET4Gv20779200	Phi
TraesCS6B02G424900	OMEGA		TRITD3Av1G253600	Phi	Truncated	TuG1812G0300000589	Phi	Misannotated	AET4Gv20779100	Phi
TraesCS6A02G385800	OMEGA		TRITD3Bv1G247000	Phi		TuG1812S0001691200	Phi		AET4Gv20779000	Phi
TraesCS6D02G370500	OMEGA		TRITD3Av1G253540	Phi		TuG1812S0001691600	Phi		AET1Gv20522000	Phi
TraesCS6A02G059600	OMEGA		TRITD3Av1G047210	Phi	Truncated	TuG1812G0100000226	Phi	Truncated	AET4Gv20778900	Phi
TraesCS6B02G080000	OMEGA		TRITD4Bv1G019310	Phi	Truncated	TuG1812G0300005232	Tau	Truncated	AET2Gv21264200	Tau
TraesCSU02G122000	OMEGA		TRITD3Av1G047220	Phi	Truncated	TuG1812G0300005231	Tau		AET3Gv20840400	Tau
TraesCS4D02G327800	Phi		TRITD3Bv1G055390	Phi	Truncated	TuG1812G0300005297	Tau		AET5Gv20989400	Tau
TraesCS4B02G330900	Phi		TRITD3Bv1G055380	Phi	Truncated	TuG1812G0300005298	Tau		AET2Gv21264100	Tau
TraesCS5A02G502300	Phi		TRITD4Bv1G019260	Phi		TuG1812G0300005585	Tau		AET2Gv21264300	Tau
TraesCS4D02G327900	Phi		TRITD7Bv1G221760	Phi		TuG1812G0300005583	Tau		AET1Gv20625600	Tau
TraesCS4B02G331000	Phi		TRITD7Bv1G221810	Phi		TuG1812G0300005224	Tau		AET5Gv20583100	Tau
TraesCS5A02G502400	Phi		TRITD7Av1G269400	Phi		TuG1812G0500001396	Tau		AET3Gv21181800	Tau
TraesCS4D02G327700	Phi		TRITD5Av1G217290	Phi		TuG1812G0500001398	Tau		AET3Gv21019000	Tau	Truncated
TraesCS4B02G330800	Phi		TRITD5Bv1G213840	Phi		TuG1812G0200006095	Tau	Truncated	AET3Gv21121100	Tau
TraesCS1A02G203900	Phi		TRITD1Bv1G036980	Phi		TuG1812G0200006097	Tau		AET3Gv21120900	Tau
TraesCS1D02G207400	Phi		TRITD1Av1G028050	Phi		TuG1812G0200006099	Tau		AET3Gv21124500	Tau
TraesCS1B02G217700	Phi		TRITD1Av1G028060	Phi		TuG1812G0200006096	Tau		AET3Gv21123900	Tau
TraesCS4D02G328000	Phi		TRITD2Av1G010010	Phi		TuG1812G0500004034	Tau		AET3Gv21123800	Tau
TraesCS4B02G331100	Phi		TRITD2Bv1G199370	Phi		TuG1812G0200006098	Tau		AET3Gv21113700	Tau
TraesCS5A02G502500	Phi		TRITD5Bv1G146940	Phi		TuG1812G0700001972	Tau		AET3Gv21122600	Tau
TraesCS3D02G445400	Phi		TRITD5Av1G209540	Phi		TuG1812G0100001467	Tau		AET3Gv21111400	Tau
TraesCS3A02G452900	Phi		TRITD5Bv1G206020	Phi	Truncated	TuG1812G0100002993	Tau		AET7Gv20039000	Tau
TraesCS3B02G490600	Phi		TRITD1Bv1G003380	Phi	Truncated	TuG1812G0500000275	Tau		AET3Gv21121000	Tau
TraesCS3A02G452800	Phi		TRITD3Bv1G175610	Phi		TuG1812G0100002193	Tau		AET7Gv20866400	Tau
TraesCS3B02G490400	Phi		TRITD3Av1G193320	Phi		TuG1812G0500002274	Tau		AET5Gv20477000	Tau
TraesCS3D02G445300	Phi		TRITD3Bv1G175700	Phi		TuG1812G0700004094	Tau		AET1Gv20484000	Tau
TraesCS3D02G299900	Phi		TRITD3Av1G193460	Phi		TuG1812U0000197200	Tau		AET7Gv20074300	Tau	Truncated
TraesCS3B02G334500	Phi		TRITD5Av1G009640	Phi		TuG1812G0700000381	Tau		AET3Gv21132800	Tau	Truncated
TraesCS3A02G302100	Phi		TRITD0Uv1G135080	Phi		TuG1812G0700000379	Tau		AET0Gv20060900	Tau
TraesCS3A02G302300	Phi		TRITD5Bv1G007800	Phi		TuG1812G0700000382	Tau		AET7Gv20074400	Tau
TraesCS3D02G299700	Phi		TRITD5Bv1G241860	Phi		TuG1812G0200001501	Tau		AET3Gv21132900	Tau
TraesCS3B02G334300	Phi		TRITD4Av1G218320	Phi		TuG1812G0100002186	Tau		AET7Gv20119700	Tau
TraesCS7D02G479100	Phi		TRITD1Av1G042220	Phi		TuG1812G0100002187	Tau		AET7Gv20074600	Tau
TraesCS7B02G398800	Phi		TRITD1Bv1G045530	Phi		TuG1812S0000376500	Tau		AET3Gv20972600	Tau
TraesCS1A02G102900	Phi		TRITD1Bv1G045570	Phi		TuG1812S0003347400	Tau		AET3Gv20972200	Tau
TraesCS1B02G113800	Phi		TRITD1Av1G042230	Phi		TuG1812G0400002670	Tau		AET3Gv20972100	Tau
TraesCS1D02G095000	Phi		TRITD1Bv1G045590	Phi		TuG1812G0700005717	Tau		AET3Gv20972000	Tau
TraesCS1A02G103000	Phi		TRITD1Av1G042240	Phi		TuG1812G0300004704	Tau		AET7Gv21172300	Tau
TraesCS1B02G114300	Phi		TRITD7Bv1G034130	Phi		TuG1812G0300004700	Tau		AET4Gv20569200	Tau
TraesCS1D02G095100	Phi		TRITD1Bv1G045790	Phi		TuG1812G0300004697	Tau		AET1Gv20484800	Tau
TraesCS1A02G102700	Phi		TRITD1Av1G042350	Phi		TuG1812G0300004698	Tau		AET1Gv20485200	Tau
TraesCS1B02G113500	Phi		TRITD6Bv1G218920	Tau		TuG1812G0600002061	Tau		AET1Gv20485000	Tau	Truncated
TraesCS1D02G094700	Phi		TRITD6Bv1G218880	Tau		TuG1812G0300003076	Tau		AET2Gv21106600	Tau
TraesCS1B02G113600	Phi		TRITD6Bv1G218890	Tau		TuG1812G0100002185	Tau		AET3Gv20283400	Tau
TraesCS1D02G094800	Phi		TRITD6Bv1G218830	Tau		TuG1812G0200005486	Tau		AET3Gv20632800	Tau
TraesCS7B02G084400	Phi		TRITD6Bv1G218860	Tau		TuG1812G0200002666	Tau		AET1Gv20485300	Tau
TraesCS1B02G114400	Phi		TRITD6Bv1G218810	Tau		TuG1812G0100002191	Tau		AET1Gv20484300	Tau
TraesCS1D02G095400	Phi		TRITD6Av1G219210	Tau		TuG1812G0100002192	Tau		AET5Gv20073200	Tau
TraesCS1A02G102800	Phi		TRITD1Av1G004040	Tau		TuG1812G0500000191	Tau		AET7Gv20108400	Tau
TraesCS1D02G094900	Phi		TRITD1Av1G004090	Tau		TuG1812G0100000248	Tau		AET1Gv20484200	Tau
TraesCS1B02G113700	Phi		TRITD1Bv1G003600	Tau		TuG1812G0100000264	Tau		AET3Gv20052100	Tau
TraesCS4A02G349700	Phi		TRITD1Bv1G003870	Tau		TuG1812G0100000261	Tau		AET3Gv20052300	Tau
TraesCS5B02G020900	Phi		TRITD1Bv1G003880	Tau		TuG1812G0400003349	Tau		AET7Gv20135700	Tau
TraesCS5B02G021100	Phi		TRITD5Av1G005690	Tau		TuG1812G0100002190	Tau		AET7Gv20327900	Tau	Truncated
TraesCS5A02G024000	Phi		TRITD2Bv1G233050	Tau		TuG1812G0600001436	Tau		AET1Gv20484700	Tau
TraesCS5B02G021800	Phi		TRITD1Bv1G115130	Tau		TuG1812G0600001434	Tau		AET4Gv20715900	Tau
TraesCS5B02G020700	Phi		TRITD1Bv1G115160	Tau	Truncated	TuG1812G0700001307	Tau		AET1Gv20484500	Tau
TraesCS5A02G024100	Phi		TRITD1Av1G122280	Tau		TuG1812G0700000651	Tau		AET1Gv20484400	Tau
TraesCS5D02G030000	Phi		TRITD1Av1G122220	Tau		TuG1812U0000030200	Tau		AET6Gv20357200	Tau
TraesCS7D02G514500	Phi		TRITD1Bv1G115120	Tau		TuG1812G0700001371	Tau		AET1Gv20037800	Tau
TraesCS7B02G443300	Phi		TRITD4Av1G002350	Tau		TuG1812G0100002189	Tau		AET1Gv20039100	Tau
TraesCS7A02G525700	Phi		TRITD4Bv1G172470	Tau		TuG1812G0600004290	Tau	Truncated	AET1Gv20036000	Tau
TraesCS7A02G525600	Phi		TRITD6Bv1G060090	Tau	Truncated	TuG1812G0600004302	Tau		AET7Gv20333600	Tau
TraesCS1D02G011800	Phi		TRITD6Av1G047210	Tau		TuG1812G0200005851	Tau	Truncated	AET1Gv20484600	Tau
TraesCS1A02G013900	Phi		TRITD6Bv1G060120	Tau		TuG1812G0200005853	Tau	Truncated	AET5Gv20038900	Tau
TraesCS5D02G440700	Phi		TRITD6Bv1G060080	Tau		TuG1812G0200003511	TCHQD		AET2Gv21091300	Tau
TraesCS5A02G432600	Phi		TRITD3Av1G001020	Tau		TuG1812G0400004015	Theta		AET2Gv20692700	TCHQD
TraesCS5B02G435000	Phi		TRITD0Uv1G023420	Tau		TuG1812G0700002023	Zeta		AET5Gv21244700	Theta
TraesCS3B02G152200	Phi		TRITD3Av1G001030	Tau		TuG1812G0500003333	Zeta		AET5Gv20153800	Zeta
TraesCS3D02G133100	Phi		TRITD7Av1G039330	Tau		TuG1812G0500000605	Zeta		AET7Gv21153800	Zeta
TraesCS4B02G059100	Phi		TRITD7Bv1G012620	Tau					AET5Gv20704900	Zeta	Misannotated
TraesCS4B02G059300	Phi		TRITD4Av1G247640	Tau
TraesCS3A02G309100	Phi		TRITD7Av1G014930	Tau
TraesCS3B02G152300	Phi		TRITD1Bv1G115110	Tau
TraesCS3D02G133200	Phi		TRITD1Av1G122240	Tau
TraesCS3A02G309000	Phi		TRITD7Av1G038540	Tau
TraesCS5D02G418100	Phi		TRITD7Bv1G010940	Tau
TraesCS2B02G420800	Phi		TRITD4Av1G251110	Tau
TraesCS2D02G400000	Phi		TRITD7Av1G011780	Tau
TraesCS5D02G268900	Phi		TRITD1Bv1G115190	Tau
TraesCS5B02G259700	Phi		TRITD1Av1G122360	Tau	Truncated
TraesCS7B02G096300	Phi		TRITD1Av1G122380	Tau	Truncated
TraesCS7D02G192500	Phi		TRITD5Bv1G006940	Tau
TraesCS2D02G044100	Phi		TRITD5Av1G008580	Tau
TraesCS2A02G045400	Phi		TRITD1Bv1G115170	Tau
TraesCS2D02G579500	Phi		TRITD1Av1G122290	Tau
TraesCS2D02G503200	Phi		TRITD2Bv1G250380	Tau
TraesCS6D02G016700	Phi		TRITD2Bv1G250370	Tau
TraesCS1A02G078900	Phi		TRITD2Av1G283210	Tau
TraesCS1D02G081200	Phi		TRITD1Bv1G115030	Tau
TraesCS1B02G097400	Phi		TRITD1Av1G122200	Tau
TraesCS1B02G097200	Phi		TRITD3Av1G174080	Tau
TraesCS1A02G078800	Phi		TRITD3Bv1G154770	Tau
TraesCS1D02G190100	Tau		TRITD2Bv1G235810	Tau
TraesCS1A02G186500	Tau		TRITD2Av1G272700	Tau
TraesCS1B02G194300	Tau		TRITD4Av1G255480	Tau
TraesCS7A02G129500	Tau		TRITD7Av1G007680	Tau
TraesCS7B02G029300	Tau		TRITD4Av1G255490	Tau
TraesCS7A02G059900	Tau		TRITD4Av1G255460	Tau
TraesCS4A02G429900	Tau		TRITD7Av1G007710	Tau
TraesCS7D02G054400	Tau		TRITD4Av1G033230	Tau
TraesCS4A02G429800	Tau		TRITD4Bv1G136790	Tau
TraesCS3B02G025000	Tau		TRITD1Bv1G115100	Tau
TraesCS3D02G025800	Tau		TRITD7Av1G252060	Tau
TraesCS3A02G021200	Tau		TRITD7Bv1G201670	Tau
TraesCS7B02G032700	Tau		TRITD1Av1G122210	Tau
TraesCS7A02G132000	Tau		TRITD1Bv1G115070	Tau
TraesCS7D02G131600	Tau		TRITD7Av1G270600	Tau
TraesCS1B02G194400	Tau		TRITD7Bv1G021820	Tau
TraesCS1D02G190000	Tau		TRITD3Av1G248840	Tau
TraesCS2B02G523700	Tau		TRITD3Bv1G240270	Tau
TraesCS6B02G429400	Tau		TRITD3Av1G248750	Tau
TraesCS1B02G021400	Tau		TRITD3Bv1G240230	Tau
TraesCS1A02G016800	Tau		TRITD3Bv1G240200	Tau
TraesCS1D02G017200	Tau		TRITD3Av1G248730	Tau
TraesCS1D02G014500	Tau		TRITD3Bv1G240210	Tau
TraesCS1B02G021100	Tau		TRITD3Av1G248740	Tau
TraesCS1D02G017000	Tau		TRITD2Av1G085850	Tau
TraesCS1A02G017300	Tau		TRITD2Bv1G091120	Tau
TraesCS1A02G017400	Tau		TRITD3Av1G045970	Tau
TraesCSU02G183000	Tau		TRITD3Bv1G054110	Tau	Truncated
TraesCSU02G184900	Tau		TRITD5Bv1G117750	Tau
TraesCS4D02G295400	Tau		TRITD0Uv1G020220	Tau
TraesCS4B02G296500	Tau		TRITD1Bv1G115240	Tau
TraesCS4A02G008400	Tau		TRITD7Bv1G143030	Tau
TraesCS1B02G194600	Tau		TRITD7Av1G202100	Tau
TraesCS1B02G194500	Tau		TRITD1Av1G164170	Tau
TraesCS1D02G189900	Tau		TRITD1Bv1G149960	Tau
TraesCS1A02G186600	Tau		TRITD5Bv1G141020	Tau
TraesCS6B02G167300	Tau		TRITD5Av1G109360	Tau
TraesCS6B02G167600	Tau		TRITD5Bv1G091180	Tau
TraesCS6B02G167500	Tau		TRITD3Bv1G261930	Tau
TraesCS6B02G167400	Tau		TRITD4Av1G257850	Tau
TraesCS6A02G139000	Tau		TRITD7Av1G004410	Tau
TraesCS6D02G127700	Tau		TRITD0Uv1G128860	Tau	Truncated
TraesCS6D02G127800	Tau		TRITD3Bv1G272030	Tau
TraesCS6A02G139100	Tau		TRITD0Uv1G120220	Tau
TraesCS5D02G027300	Tau		TRITD3Bv1G272040	Tau
TraesCS5D02G027500	Tau		TRITD3Bv1G272050	Tau
TraesCS5B02G018400	Tau		TRITD3Bv1G262040	Tau
TraesCS5A02G021700	Tau		TRITD3Bv1G262030	Tau
TraesCS2B02G574500	Tau		TRITD3Av1G266880	Tau
TraesCS2D02G545400	Tau		TRITD3Bv1G261220	Tau
TraesCS2A02G544400	Tau		TRITD3Av1G267350	Tau	Truncated
TraesCS2B02G574600	Tau		TRITD3Bv1G260970	Tau
TraesCS1B02G194700	Tau		TRITD3Bv1G262150	Tau
TraesCS1D02G189800	Tau		TRITD3Bv1G262070	Tau
TraesCS1A02G186700	Tau		TRITD4Av1G237050	Tau
TraesCS1B02G194800	Tau	Misannotated	TRITD0Uv1G113520	Tau
TraesCS1A02G186800	Tau		TRITD0Uv1G116270	Tau
TraesCS1D02G189700	Tau		TRITD3Bv1G249570	Tau
TraesCS4A02G435300	Tau		TRITD3Av1G256830	Tau
TraesCS7A02G049400	Tau		TRITD3Av1G217370	Tau
TraesCS7D02G044500	Tau		TRITD4Bv1G163000	Tau
TraesCS3A02G129800	Tau		TRITD3Av1G267780	Tau
TraesCS3D02G130700	Tau		TRITD3Bv1G262560	Tau
TraesCS2A02G218700	Tau		TRITD3Av1G267420	Tau
TraesCS2D02G224700	Tau		TRITD3Bv1G262230	Tau
TraesCS2B02G244100	Tau		TRITD3Av1G267650	Tau
TraesCS1D02G191100	Tau		TRITD3Bv1G262750	Tau
TraesCS1A02G186100	Tau		TRITD3Bv1G262740	Tau
TraesCS1B02G194000	Tau		TRITD3Av1G267670	Tau
TraesCS1D02G190600	Tau		TRITD5Av1G214950	Tau
TraesCS1A02G186200	Tau		TRITD5Bv1G211440	Tau
TraesCS3D02G261100	Tau		TRITD5Av1G214960	Tau
TraesCS3B02G234100	Tau		TRITD5Bv1G211470	Tau
TraesCS3A02G260800	Tau		TRITD3Bv1G211640	Tau
TraesCS2A02G504300	Tau		TRITD3Av1G219140	Tau
TraesCS2B02G532600	Tau		TRITD2Av1G291450	Tau
TraesCS2D02G504900	Tau		TRITD2Bv1G261230	Tau
TraesCS2A02G144300	Tau		TRITD0Uv1G116910	Tau
TraesCS1D02G190200	Tau		TRITD5Bv1G192570	Tau
TraesCS1A02G186400	Tau		TRITD2Bv1G261260	Tau
TraesCS1B02G194200	Tau		TRITD2Av1G291520	Tau
TraesCS1D02G190500	Tau		TRITD0Uv1G106370	Tau
TraesCS1B02G194100	Tau		TRITD2Bv1G261210	Tau
TraesCS1D02G190300	Tau		TRITD2Av1G291440	Tau
TraesCS1A02G186300	Tau		TRITD2Bv1G261220	Tau
TraesCS4D02G225800	Tau		TRITD2Av1G291470	Tau
TraesCS4B02G225200	Tau		TRITD2Bv1G261240	Tau
TraesCS7D02G465400	Tau		TRITD2Av1G187150	TCHQD
TraesCS7B02G380300	Tau		TRITD2Bv1G152910	TCHQD
TraesCS7A02G477900	Tau		TRITD7Bv1G000100	Theta
TraesCS7B02G058000	Tau		TRITD5Bv1G023240	Zeta
TraesCS7B02G057500	Tau		TRITD5Av1G022810	Zeta
TraesCS7A02G531100	Tau		TRITD5Bv1G023800	Zeta
TraesCS3D02G430200	Tau		TRITD5Bv1G165270	Zeta
TraesCS3A02G437900	Tau		TRITD5Av1G174760	Zeta
TraesCS3B02G471900	Tau		TRITD7Bv1G197220	Zeta
TraesCS3D02G429900	Tau		TRITD7Av1G248740	Zeta
TraesCS3A02G437600	Tau		TRITD5Bv1G165280	Zeta
TraesCS3A02G437500	Tau		TRITD5Av1G174780	Zeta
TraesCS3D02G429800	Tau
TraesCS3B02G471600	Tau
TraesCS3D02G429600	Tau
TraesCS3B02G471500	Tau
TraesCS3D02G429700	Tau
TraesCS3A02G437400	Tau
TraesCS1B02G194900	Tau
TraesCS1D02G189600	Tau
TraesCS1A02G187000	Tau
TraesCS5B02G192400	Tau
TraesCS5D02G200100	Tau
TraesCS5A02G190900	Tau
TraesCS7A02G374900	Tau
TraesCS7D02G348500	Tau
TraesCS7B02G252500	Tau
TraesCS7D02G030700	Tau
TraesCS7A02G034300	Tau
TraesCS4A02G454800	Tau
TraesCS4A02G454500	Tau
TraesCS4A02G454700	Tau
TraesCS7A02G034200	Tau
TraesCS3D02G490700	Tau
TraesCS7A02G034500	Tau
TraesCS4A02G455000	Tau
TraesCS7D02G050800	Tau
TraesCS7D02G030800	Tau
TraesCS2B02G609600	Tau
TraesCS2A02G578200	Tau
TraesCS2D02G589400	Tau
TraesCS2A02G577900	Tau
TraesCS2A02G578000	Tau
TraesCS2D02G589300	Tau
TraesCS2A02G578400	Tau
TraesCS2D02G589600	Tau
TraesCS2B02G609400	Tau
TraesCS5D02G384400	Tau
TraesCS5B02G376800	Tau
TraesCS5A02G374800	Tau
TraesCS2D02G589500	Tau
TraesCS2A02G578300	Tau
TraesCS2B02G609500	Tau
TraesCS3A02G376700	Tau
TraesCS3D02G369600	Tau
TraesCS3B02G409200	Tau
TraesCS5A02G424100	Tau
TraesCS5B02G426400	Tau
TraesCS5D02G432700	Tau
TraesCS5A02G424000	Tau
TraesCS5D02G432600	Tau
TraesCS5B02G426300	Tau
TraesCS3D02G512200	Tau
TraesCS3B02G571200	Tau
TraesCS3B02G571100	Tau
TraesCS3D02G486200	Tau
TraesCS3B02G540100	Tau
TraesCS3B02G540200	Tau
TraesCS3D02G486100	Tau
TraesCS3B02G539800	Tau
TraesCS3B02G540700	Tau
TraesCS3D02G485700	Tau
TraesCS4B02G274400	Tau
TraesCS3D02G487400	Tau
TraesCS3B02G539000	Tau
TraesCS3D02G487200	Tau
TraesCS3A02G379200	Tau
TraesCS3D02G452100	Tau	Misannotated
TraesCS3A02G459500	Tau
TraesCS3B02G499200	Tau
TraesCS3B02G538500	Tau
TraesCS3B02G538600	Tau
TraesCS3B02G538800	Tau
TraesCS3B02G538700	Tau
TraesCS3A02G488300	Tau
TraesCS3A02G488200	Tau
TraesCS3B02G536100	Tau
TraesCS3D02G483000	Tau
TraesCS4A02G469800	Tau
TraesCS7A02G021900	Tau
TraesCS7D02G019400	Tau
TraesCS3B02G539100	Tau
TraesCS3D02G487300	Tau
TraesCSU02G234300	Tau
TraesCS7A02G083700	Tau
TraesCS7D02G078700	Tau
TraesCS3B02G539300	Tau
TraesCS3D02G486800	Tau
TraesCS3A02G487700	Tau
TraesCS3B02G535300	Tau
TraesCS3D02G482700	Tau
TraesCS3B02G535700	Tau
TraesCS1A02G258500	Tau
TraesCS1B02G269100	Tau
TraesCS1D02G257800	Tau
TraesCS7D02G188400	Tau
TraesCS7A02G187300	Tau
TraesCS5A02G143500	Tau
TraesCS5B02G142500	Tau
TraesCS5D02G148500	Tau
TraesCS5B02G244700	Tau
TraesCS5A02G247500	Tau
TraesCS5D02G254000	Tau
TraesCS2A02G306100	TCHQD
TraesCS2D02G304500	TCHQD
TraesCS2B02G322800	TCHQD
TraesCS5D02G563900	Theta
TraesCS7B02G000300	Theta
TraesCS5B02G572400	Theta
TraesCS5B02G303200	Zeta
TraesCS5D02G309700	Zeta
TraesCS5A02G302900	Zeta
TraesCS5D02G309800	Zeta
TraesCS5B02G303300	Zeta
TraesCS5A02G303000	Zeta
TraesCS7B02G370000	Zeta
TraesCS7A02G468400	Zeta
TraesCS7D02G456000	Zeta
TraesCS5A02G051800	Zeta
TraesCS5D02G062900	Zeta
TraesCS5B02G055900	Zeta
TraesCS5B02G057800	Zeta

## Sheet: Table S4
Table S4: The results of a BLASTN search against the Ae. tauschii genome sequence using the MAPEG gene (AT1G65820) from A. thaliana as query.
Query id	Query Start	Query End	Subject id	Subject Start	Subject End	Identity (%)	e-value
ATMAPEG	63	122	Chr4D	21343226	21343047	61.667	3.09e-27
ATMAPEG	39	64	Chr4D	21343393	21343316	76.923	3.09e-27
ATMAPEG	3	39	Chr4D	21343583	21343473	67.568	3.09e-27
ATMAPEG	63	126	Chr4D	21425011	21424820	59.375	4.5e-25
ATMAPEG	40	64	Chr4D	21425163	21425089	76	4.5e-25
ATMAPEG	3	39	Chr4D	21425368	21425258	62.162	4.5e-25
ATMAPEG	63	136	Chr4D	21460135	21459917	58.108	4.85e-20
ATMAPEG	39	80	Chr4D	21460319	21460188	61.364	3.73e-08
ATMAPEG	1	40	Chr4D	21460530	21460414	65	3.73e-08

## Sheet: Table S5
Table S5: Differentially expressed GST genes at different salt concentrations.
ID	100mM/CK		200mM/CK		300mM/CK		200mM/100mM		300mM/100mM		300mM/200mM
	log2FoldChange	pvalue	log2FoldChange	pvalue	log2FoldChange	pvalue	log2FoldChange	pvalue	log2FoldChange	pvalue	log2FoldChange	pvalue
TraesCS2A02G125200	-0.128852	0.00573724	0.5354	1.17112e-30	-0.453368	1.33929e-21	0.664252	2.67568e-46	-0.324516	8.14451e-12	-0.988768	7.41084e-97
TraesCS2A02G169800	-0.203469	1.64679e-06	0.292012	5.99493e-12	-0.389102	2.18336e-19	0.49548	2.00171e-31	-0.185633	1.77661e-05	-0.681113	6.98523e-56
TraesCS2B02G147700	-0.0702476	0.124897	0.765776	1.74369e-63	-0.259159	2.47002e-08	0.836023	1.57043e-75	-0.188912	4.70254e-05	-1.02494	3.49957e-109
TraesCS2B02G196100	-0.253694	2.89925e-07	0.403773	2.78121e-16	-0.533402	1.95742e-26	0.657468	2.12965e-40	-0.279708	2.51801e-08	-0.937176	4.18422e-78
TraesCS2D02G128300	-0.192566	7.87327e-07	0.510377	1.97794e-39	-0.525291	9.21973e-40	0.702943	4.37239e-73	-0.332725	6.66572e-17	-1.03567	4.2427e-150
TraesCS2D02G177300	-0.0772164	0.0410268	0.657203	9.93661e-69	-0.30899	2.12329e-15	0.734419	8.67498e-86	-0.231774	2.44132e-09	-0.966193	2.04111e-138
TraesCS6A02G059600	-1.20681	2.45877e-181	-0.956553	3.57329e-112	-0.212316	2.63348e-07	0.250259	1.16281e-08	0.994496	2.86912e-120	0.744237	9.16784e-67
TraesCS6B02G080000	-1.07159	8.03964e-61	-0.197576	0.00206012	1.11041	2.09121e-71	0.874011	6.841e-40	2.182	3.89521e-253	1.30799	3.2618e-95
TraesCS6B02G424900	0.374696	0.200901	0.206276	0.490628	0.39305	0.186295	-0.168419	0.567279	0.0183541	0.949971	0.186773	0.531952
TraesCSU02G122000	-1.52123	1.44778e-166	-0.921381	3.82442e-63	0.718	1.14458e-43	0.599845	3.34482e-25	2.23923	0	1.63938	1.00358e-198
TraesCS4A02G269600	0.655911	2.17716e-15	1.72707	5.68935e-100	1.57985	2.67285e-83	1.07116	1.31715e-42	0.923944	7.1588e-32	-0.14722	0.0566474
TraesCS4A02G269700	-0.281802	0.00207043	0.179492	0.0500419	1.07603	7.16184e-34	0.461294	5.5152e-07	1.35783	2.7683e-52	0.896539	1.06793e-23
TraesCS4A02G269800	0.307187	4.64423e-08	0.730097	2.02551e-38	1.37755	1.1775e-136	0.42291	2.13989e-14	1.07036	2.59155e-86	0.647454	1.41275e-32
TraesCS4B02G044300	0.0168504	0.808688	0.591436	1.67904e-17	1.28544	4.45975e-78	0.574586	1.01312e-16	1.26859	1.12485e-76	0.694008	3.04508e-24
TraesCS4B02G044400	0.130803	0.319203	0.39193	0.00324811	2.49403	2.31808e-91	0.261127	0.0458273	2.36323	9.78536e-86	2.1021	4.59823e-66
TraesCS4B02G044500	0.227966	0.00989178	0.753101	1.3879e-17	1.39553	1.10767e-58	0.525135	1.33089e-09	1.16756	3.49931e-43	0.642425	3.09238e-14
TraesCS4D02G041800	-0.0534239	0.4391	0.350587	4.22428e-07	0.126892	0.0705789	0.40401	4.72565e-09	0.180316	0.00984805	-0.223694	0.00142052
TraesCS4D02G041900	0.22416	0.21513	-0.430047	0.0228293	1.03137	9.20622e-09	-0.654207	0.000466238	0.807212	5.39081e-06	1.46142	3.53749e-15
TraesCS4D02G042000	0.14746	0.0551646	0.772513	6.81488e-24	0.600178	6.47948e-15	0.625053	1.96873e-16	0.452718	3.06251e-09	-0.172336	0.0235531
TraesCS1A02G045700	0.544809	6.42781e-26	1.26486	6.80694e-134	0.914896	2.72981e-69	0.720048	1.77005e-47	0.370088	2.0967e-13	-0.349961	2.59627e-12
TraesCS7A02G190700	0.0370678	0.878787	0.316549	0.197143	-0.0548605	0.82697	0.279481	0.250557	-0.0919283	0.711794	-0.37141	0.139187
TraesCS1B02G059100	0.471216	7.05566e-26	1.3069	3.59805e-190	0.512588	1.59683e-29	0.835682	3.06956e-82	0.0413711	0.352796	-0.794311	2.39518e-72
TraesCS7B02G095600	-0.258406	0.309395	-0.430592	0.101738	0.0926686	0.717355	-0.172186	0.514556	0.351075	0.172071	0.523261	0.0490801
TraesCS7D02G191700	-0.129037	0.640342	-0.129568	0.64624	-0.538194	0.0630656	-0.000531007	0.998498	-0.409157	0.157275	-0.408626	0.166198
TraesCS4A02G103700	2.67982	0.0867889	3.19336	0.0408768	7.6633	3.87337e-08	0.513534	0.682866	4.98348	1.71185e-06	4.46994	1.6265e-05
TraesCS4A02G103800	1.2167	1.65926e-06	2.70879	3.83685e-28	1.12312	1.76127e-05	1.49209	1.25365e-11	-0.0935807	0.693319	-1.58567	4.42765e-12
TraesCS4A02G103900	0.585334	4.80617e-05	3.5935	1.80412e-162	2.42041	2.75079e-71	3.00816	3.06351e-134	1.83508	2.20096e-48	-1.17308	1.06466e-25
TraesCS4A02G104300	1.06404	1.36807e-11	1.96113	1.48557e-36	1.2388	8.02439e-15	0.897093	4.40952e-10	0.174764	0.238635	-0.722329	7.66175e-07
TraesCS7A02G455000	0.361724	0.319279	-0.56808	0.136739	-1.97305	4.00426e-06	-0.929804	0.0136682	-2.33477	3.58032e-08	-1.40496	0.00139769
TraesCS4B02G199700	0.913424	1.04618e-05	2.08656	3.73446e-25	1.93098	1.59855e-21	1.17314	1.60137e-10	1.01756	3.68213e-08	-0.155578	0.382719
TraesCS4B02G200000	0.831885	4.032e-05	3.3403	2.26356e-69	1.91206	3.01941e-22	2.50841	2.06105e-48	1.08017	1.84191e-09	-1.42824	4.95864e-18
TraesCS4B02G200100	3.2274	0.0212631	6.4741	1.44436e-06	3.84253	0.00592854	3.2467	2.91411e-05	0.615134	0.477001	-2.63156	0.000611499
TraesCS4D02G200700	0.738513	0.167034	1.52422	0.00404761	2.1667	3.54076e-05	0.785706	0.124054	1.42819	0.00462349	0.642482	0.198655
TraesCS4D02G201100	0.894608	9.12963e-12	3.99835	1.45533e-240	3.87326	4.9617e-225	3.10375	6.75384e-189	2.97865	2.69815e-173	-0.125097	0.17809
TraesCS4D02G201200	-1.78615	0.0180233	3.23435	1.69602e-09	2.7611	3.4499e-07	5.02049	6.56515e-13	4.54724	9.41618e-11	-0.47325	0.302809
TraesCS4D02G201300	4.00845	0.0158337	5.10384	0.00184963	6.30936	9.412e-05	1.09539	0.372814	2.30091	0.0546308	1.20552	0.301384
TraesCSU02G231100	-1.26707	0.0344551	-2.1339	0.000429135	-1.69999	0.00482832	-0.866829	0.154163	-0.432919	0.474665	0.43391	0.478525
TraesCS5B02G572400	-0.688811	1.1918e-34	-1.34777	3.53333e-113	-0.463016	3.34523e-16	-0.65896	1.21113e-27	0.225795	8.98407e-05	0.884754	1.46782e-47
TraesCS7B02G000300	-0.0812356	0.229293	0.306285	6.19651e-06	-0.145726	0.0345109	0.38752	1.0016e-08	-0.0644907	0.348506	-0.452011	5.65621e-11
TraesCS5D02G563900	-0.203254	0.000271639	-0.0471612	0.404322	-0.0168605	0.765518	0.156093	0.0058622	0.186394	0.000996731	0.0303007	0.597246
TraesCS5A02G051800	-0.218805	7.36415e-07	0.0960072	0.0306812	-0.00182166	0.967424	0.314813	1.51272e-12	0.216984	1.20157e-06	-0.0978288	0.0294194
TraesCS5A02G302900	0.319042	1.97875e-08	1.08814	5.66802e-83	1.01303	8.20912e-72	0.769093	8.68473e-44	0.693991	8.5013e-36	-0.0751025	0.17297
TraesCS5A02G303000	-0.0344336	0.644486	-0.239187	0.00179463	-0.0503767	0.507658	-0.204753	0.00730969	-0.015943	0.833334	0.18881	0.0151251
TraesCS7A02G468400	0.0902125	0.342975	0.78021	1.30995e-16	0.636119	2.10585e-11	0.689998	1.30114e-13	0.545907	5.94855e-09	-0.144091	0.121283
TraesCS5B02G055900	-0.861044	3.76629e-29	-0.739172	1.82417e-21	-0.646067	7.68965e-17	0.121872	0.12215	0.214977	0.00627524	0.0931049	0.241524
TraesCS5B02G057800	-0.644368	6.87867e-18	-0.86095	3.71863e-29	-0.480423	2.15353e-10	-0.216582	0.00533453	0.163944	0.0323185	0.380526	1.28255e-06
TraesCS5B02G303200	0.307404	1.29875e-07	0.856779	3.4156e-49	0.652666	7.24538e-29	0.549375	6.6746e-22	0.345262	1.98053e-09	-0.204113	0.000379371
TraesCS5B02G303300	-0.143078	0.0932672	-1.00068	1.76129e-28	-0.346035	7.53951e-05	-0.857598	2.3277e-21	-0.202957	0.0202108	0.65464	1.4102e-12
TraesCS7B02G370000	0.54853	0.0371905	1.56388	1.64247e-09	1.73011	2.19863e-11	1.01535	5.32637e-05	1.18158	2.37518e-06	0.166228	0.499773
TraesCS5D02G062900	-0.529496	2.93194e-22	-0.579966	1.57262e-25	-0.253874	3.82887e-06	-0.0504698	0.367648	0.275622	6.6374e-07	0.326092	7.33413e-09
TraesCS5D02G309700	0.707175	4.83475e-35	1.2236	1.58674e-101	1.19572	9.86709e-97	0.516424	5.78206e-21	0.488542	7.23643e-19	-0.0278821	0.612249
TraesCS5D02G309800	-0.131171	0.0548116	-0.329358	3.13691e-06	0.154266	0.0252736	-0.198187	0.00499404	0.285437	3.42672e-05	0.483624	1.11913e-11
TraesCS7D02G456000	0.520281	0.00179512	1.15809	2.9534e-12	0.360149	0.0349495	0.637806	7.92225e-05	-0.160132	0.336419	-0.797937	1.5027e-06
TraesCS2A02G306100	0.26666	0.378652	0.648552	0.03308	0.683422	0.0246352	0.381892	0.199547	0.416762	0.161251	0.0348696	0.907149
TraesCS2B02G322800	-0.0719702	0.837721	-0.0240935	0.946698	0.615612	0.0771936	0.0478767	0.893887	0.687582	0.0474335	0.639705	0.0723032
TraesCS2D02G304500	-0.357803	0.377682	0.659181	0.0964383	1.14812	0.00330599	1.01698	0.0110945	1.50592	0.000136385	0.48894	0.204634
TraesCS1A02G013900	-0.261518	0.0944981	-1.80738	5.52742e-24	1.27552	5.63324e-17	-1.54586	7.01367e-18	1.53704	9.10203e-24	3.0829	9.366e-69
TraesCS1A02G078800	1.59739	6.37945e-117	1.89214	1.94695e-161	2.93517	0	0.294743	2.83584e-06	1.33777	3.70016e-106	1.04303	2.3262e-64
TraesCS1A02G078900	1.91785	0.133441	0.307229	0.820402	-0.0981309	0.943547	-1.61063	0.208164	-2.01599	0.124972	-0.40536	0.770142
TraesCS1A02G102700	1.10312	4.59469e-71	2.03781	6.02487e-244	2.86829	0	0.934697	7.56164e-61	1.76517	9.16409e-220	0.830478	1.06522e-51
TraesCS1A02G102800	0.250364	3.46111e-07	0.329836	2.73637e-11	0.831718	1.85117e-64	0.0794723	0.105725	0.581354	6.72387e-33	0.501882	1.46653e-24
TraesCS1A02G102900	-0.327187	0.180832	0.443635	0.0645549	2.41082	5.75906e-27	0.770822	0.00150336	2.738	1.96053e-33	1.96718	9.16866e-19
TraesCS1A02G103000	-0.178531	0.0241571	0.422244	8.66249e-08	1.267	2.33028e-60	0.600775	2.75307e-14	1.44554	7.14309e-78	0.844761	5.92533e-28
TraesCS1A02G203900	1.52771	1.176e-20	1.28619	1.29621e-14	-1.09623	2.31801e-08	-0.241524	0.123165	-2.62395	1.88217e-44	-2.38242	5.39408e-36
TraesCS2A02G045400	1.30488	2.86985e-07	0.317231	0.235981	5.50769	3.85141e-110	-0.987646	0.000104018	4.20281	5.82996e-73	5.19046	7.19352e-98
TraesCS3A02G302100	0.63228	2.78688e-67	1.06504	3.26658e-187	1.183	9.10372e-231	0.432764	7.50578e-33	0.550722	3.469e-52	0.117958	0.00113459
TraesCS3A02G302300	-2.03613	0.310813	-1.55013	0.44035	1.65802	0.326992	0.486002	0.826184	3.69415	0.0555574	3.20815	0.0963883
TraesCS3A02G309000	-2.05675	1.04046e-155	-2.32217	1.82627e-180	-1.099	1.46754e-47	-0.265421	0.00176174	0.957752	4.19755e-33	1.22317	1.33733e-48
TraesCS3A02G309100	-3.28707	0	-3.37869	0	-1.546	1.49456e-122	-0.0916188	0.284931	1.74107	6.02279e-118	1.83269	2.90283e-115
TraesCS3A02G452800	0.569199	6.60692e-06	1.2876	1.06505e-24	1.15895	3.67568e-20	0.718405	3.73483e-09	0.589754	1.44486e-06	-0.128651	0.289808
TraesCS3A02G452900	-0.329523	0.000448716	0.132584	0.158039	0.0140172	0.881596	0.462107	9.14056e-07	0.34354	0.000270214	-0.118567	0.208858
TraesCS4A02G349700	-0.0863071	0.233104	0.0711287	0.334956	1.81205	1.68213e-152	0.157436	0.0322255	1.89836	1.65244e-168	1.74093	3.02159e-136
TraesCS5A02G024000	0.720496	0.141019	1.15445	0.0186143	4.08149	9.03149e-19	0.433957	0.349197	3.361	7.78684e-15	2.92704	1.50226e-11
TraesCS5A02G024100	0.641284	2.25113e-43	0.728346	5.18074e-54	1.34793	2.70456e-187	0.087062	0.0562194	0.706645	2.43238e-56	0.619583	1.59391e-42
TraesCS5A02G432600	0.909909	3.23565e-06	3.18116	2.12852e-70	4.90149	1.41091e-173	2.27125	5.77382e-51	3.99158	1.07794e-165	1.72033	1.88107e-44
TraesCS5A02G502300	0.596678	7.39854e-05	0.870169	8.99858e-09	-1.51527	5.16319e-18	0.273491	0.0642781	-2.11195	1.30576e-34	-2.38544	2.46448e-43
TraesCS5A02G502400	2.31513	2.73508e-06	2.0134	6.21391e-05	-0.948072	0.13493	-0.301725	0.495387	-3.2632	2.80051e-08	-2.96147	6.52829e-07
TraesCS5A02G502500	0.975352	3.07116e-08	1.73856	2.15432e-23	0.0769938	0.68719	0.76321	2.6911e-06	-0.898358	6.43613e-07	-1.66157	1.52625e-20
TraesCS7A02G525700	-0.472119	2.46175e-07	-0.484796	1.94645e-07	-0.298997	0.0012338	-0.0126777	0.892654	0.173121	0.0636363	0.185799	0.0504296
TraesCS1B02G097200	1.51843	1.24258e-27	2.18509	6.69927e-56	1.19523	8.96916e-17	0.666662	1.15261e-07	-0.323206	0.0137832	-0.989868	3.3479e-14
TraesCS1B02G097400	2.09904	3.50276e-58	2.70205	1.17112e-95	2.89043	7.20231e-110	0.603009	1.0857e-07	0.791389	2.54897e-12	0.188381	0.09452
TraesCS1B02G113500	0.536993	4.04959e-12	1.15885	3.96428e-51	2.61021	4.14112e-268	0.621861	6.56481e-17	2.07322	9.08278e-183	1.45136	1.34111e-91
TraesCS1B02G113600	2.33163	0.000125087	1.83206	0.0031239	0.824328	0.201002	-0.499576	0.373032	-1.5073	0.0103687	-1.00773	0.0933309
TraesCS1B02G113700	-0.0814809	0.201993	-0.514018	1.65968e-15	-0.647421	1.43324e-23	-0.432537	2.00139e-11	-0.56594	2.09721e-18	-0.133403	0.0411635
TraesCS1B02G113800	-0.435812	2.9602e-06	-0.363854	0.000142528	0.611976	1.6866e-11	0.0719587	0.457825	1.04779	6.77494e-30	0.975829	6.60444e-25
TraesCS1B02G114300	-0.820373	3.1048e-31	-0.26209	0.000191527	0.953316	3.9237e-46	0.558283	1.39331e-14	1.77369	9.40638e-145	1.21541	1.32486e-69
TraesCS1B02G114400	0.593852	0.000207698	0.758519	3.29965e-06	2.74145	4.55012e-73	0.164668	0.287403	2.1476	3.29807e-51	1.98293	5.23526e-42
TraesCS1B02G217700	1.78505	1.57484e-21	2.0094	1.51748e-26	-1.26513	1.63979e-07	0.224351	0.190551	-3.05018	1.2709e-40	-3.27453	3.45802e-46
TraesCS2B02G420800	0	1	0	1	2.90264	0.50187	0	1	3.05693	0.479424	2.57093	0.551982
TraesCS3B02G152200	-0.666749	0.00757648	0.368656	0.130617	1.81754	1.27841e-14	1.0354	3.29132e-05	2.48429	7.95493e-25	1.44888	7.57595e-10
TraesCS3B02G152300	-1.2194	0.0270075	-0.312843	0.560409	-0.450674	0.405874	0.906553	0.109217	0.768722	0.177941	-0.137832	0.804567
TraesCS3B02G334300	-0.220977	0.107702	0.233802	0.0891637	0.682626	4.56815e-07	0.454779	0.000976395	0.903603	2.79101e-11	0.448824	0.000958603
TraesCS3B02G334500	0.66009	2.00318e-74	0.897565	1.28185e-135	0.98281	2.59099e-162	0.237475	4.31304e-11	0.32272	3.16754e-19	0.0852453	0.0180618
TraesCS3B02G490400	1.05343	1.45856e-37	1.312	2.27128e-56	1.56861	3.75825e-81	0.258574	0.000838269	0.515183	1.80293e-11	0.256609	0.000914445
TraesCS3B02G490600	0.134747	0.0140209	0.757693	1.38305e-43	2.91513	0	0.622946	2.61261e-30	2.78038	0	2.15743	0
TraesCS4B02G059100	-1.70758	7.58224e-74	-1.5593	1.8911e-59	-0.269537	0.00282554	0.148272	0.140764	1.43804	1.9514e-51	1.28977	3.82124e-40
TraesCS4B02G059300	-1.84821	1.20366e-46	-1.46747	1.61496e-29	0.960915	8.13869e-17	0.380735	0.00678412	2.80912	3.75144e-108	2.42839	8.34392e-80
TraesCS4B02G330800	1.0141	2.12669e-07	1.04828	1.26052e-07	-1.2227	2.34224e-07	0.0341811	0.85598	-2.2368	1.08168e-22	-2.27098	7.09111e-23
TraesCS4B02G330900	0.846752	1.64476e-12	1.38703	5.06984e-31	-0.971406	5.8957e-13	0.540278	3.02693e-06	-1.81816	1.30204e-43	-2.35844	2.6681e-72
TraesCS4B02G331000	1.41415	0.234649	1.31346	0.277933	-2.36452	0.150448	-0.100694	0.928814	-3.77867	0.0170499	-3.67798	0.021482
TraesCS4B02G331100	0.705403	3.45941e-05	1.14041	2.32369e-11	0.483219	0.00584888	0.435006	0.00808912	-0.222184	0.188986	-0.657189	0.000104771
TraesCS5B02G020700	0.313418	3.99359e-09	0.460515	1.08486e-17	1.53555	4.47508e-188	0.147097	0.00554068	1.22213	2.37459e-123	1.07503	5.12932e-94
TraesCS5B02G020900	-0.144047	0.322754	-3.0967	9.84979e-49	-0.216255	0.148407	-2.95265	1.76493e-44	-0.0722077	0.629302	2.88045	2.24984e-41
TraesCS5B02G021100	-2.89881	0.407849	-3.3746	0.335279	-3.35381	0.338265	-0.47579	0.89645	-0.455	0.900951	0	1
TraesCS5B02G021800	0.0255107	0.885071	0.273969	0.122092	0.802314	5.02281e-06	0.248459	0.159635	0.776803	9.32787e-06	0.528345	0.00267987
TraesCS5B02G435000	-0.369602	1.46794e-07	-0.149868	0.0364398	2.79659	0	0.219735	0.00245134	3.1662	0	2.94646	0
TraesCS7B02G084400	0.252583	0.0325932	0.126091	0.299729	0.708693	2.17193e-09	-0.126492	0.289856	0.456109	8.76889e-05	0.582602	1.14072e-06
TraesCS7B02G096300	1.82743	5.80898e-29	2.49792	4.6393e-53	1.19912	1.9669e-12	0.670491	3.62574e-06	-0.628302	4.08226e-05	-1.29879	1.55503e-17
TraesCS7B02G398800	-0.486508	4.09127e-13	0.0397058	0.553157	1.66781	7.09387e-150	0.526213	8.96734e-15	2.15432	1.92767e-241	1.62811	2.43113e-139
TraesCS7B02G443300	-2.36948	0.279832	0.343446	0.860753	0.379094	0.846395	2.71292	0.215792	2.74857	0.209638	0.0356476	0.98546
TraesCS1D02G011800	-0.588411	1.16011e-05	-3.13519	1.7e-67	0.340874	0.00994984	-2.54678	1.8606e-44	0.929284	4.4309e-12	3.47606	1.64709e-82
TraesCS1D02G081200	2.33985	0	3.15157	0	2.57009	0	0.811713	5.40136e-59	0.230231	5.55183e-06	-0.581482	8.67531e-31
TraesCS1D02G094700	0.484541	1.80877e-27	1.43149	5.10964e-232	2.00888	0	0.946949	1.17257e-108	1.52434	2.46968e-285	0.577392	7.9305e-44
TraesCS1D02G094800	2.3103	0.0014346	3.5872	5.00732e-07	2.92197	5.30575e-05	1.2769	0.0284719	0.611668	0.303234	-0.665232	0.251885
TraesCS1D02G094900	0.723376	3.17758e-18	0.659443	4.27623e-15	1.58013	1.81608e-81	-0.0639325	0.437418	0.856755	3.35648e-26	0.920688	2.46544e-29
TraesCS1D02G095000	0.463249	0.0692353	0.748105	0.00356611	3.30971	1.74637e-41	0.284856	0.255259	2.84646	8.7033e-33	2.56161	1.75861e-26
TraesCS1D02G095100	-0.938101	1.10828e-29	-0.64362	1.39346e-14	0.617072	1.47081e-14	0.294481	0.00059055	1.55517	2.01371e-79	1.26069	6.00866e-52
TraesCS1D02G095400	-0.273065	5.06847e-10	-0.308288	2.94037e-12	0.475249	2.18734e-27	-0.0352226	0.425602	0.748314	3.30285e-65	0.783537	1.48804e-70
TraesCS1D02G207400	1.59561	8.85113e-29	1.65763	3.62242e-30	-0.159136	0.329765	0.0620189	0.637163	-1.75475	3.78831e-31	-1.81676	1.58123e-32
TraesCS2D02G044100	0.319011	0.478051	-0.844386	0.067254	4.89978	2.85717e-28	-1.1634	0.0113116	4.58077	3.79407e-25	5.74417	1.13861e-36
TraesCS2D02G400000	1.40462	0.237876	2.34557	0.0436615	5.37465	9.28409e-07	0.940954	0.318455	3.97003	3.79896e-06	3.02908	0.000223303
TraesCS2D02G503200	1.73271	0.000520745	1.32309	0.00936642	-2.0779	0.00238585	-0.409618	0.391087	-3.8106	8.13401e-09	-3.40098	3.61056e-07
TraesCS2D02G579500	0.896952	0.0171521	1.10184	0.00371902	-1.12971	0.0116431	0.204891	0.57143	-2.02666	2.83606e-06	-2.23155	3.05688e-07
TraesCS3D02G133100	-2.02454	3.37735e-17	-0.90348	7.67799e-05	2.28815	5.11053e-28	1.12106	8.33802e-06	4.31269	4.03782e-76	3.19163	5.15867e-47
TraesCS3D02G133200	0.854667	0.000202268	2.05448	2.46154e-20	3.03173	1.34378e-44	1.19981	2.47549e-09	2.17706	4.72697e-29	0.977252	1.38041e-07
TraesCS3D02G299700	-0.392701	5.05356e-06	0.0509914	0.554069	0.606943	8.87473e-13	0.443693	3.17445e-07	0.999644	1.47868e-31	0.555952	8.50175e-11
TraesCS3D02G299900	0.656707	3.8797e-94	0.821629	1.63434e-145	0.822991	6.20804e-146	0.164922	2.03179e-07	0.166284	1.62073e-07	0.00136196	0.965865
TraesCS3D02G445300	0.941515	6.45264e-20	1.78766	1.16262e-68	1.72497	8.33165e-64	0.846143	2.67496e-18	0.783456	7.6304e-16	-0.0626875	0.514532
TraesCS3D02G445400	-0.248213	7.2466e-07	-0.0240985	0.630974	1.05962	6.73012e-100	0.224114	7.99836e-06	1.30783	5.22914e-151	1.08371	5.09577e-104
TraesCS4D02G327700	-0.140728	0.404122	-0.381973	0.0273682	-2.55725	2.34632e-34	-0.241245	0.16336	-2.41652	7.14153e-31	-2.17527	1.56103e-24
TraesCS4D02G327800	0.487679	0.000224814	0.509024	0.000149894	-1.38669	1.85581e-19	0.0213442	0.870747	-1.87437	2.27571e-35	-1.89571	2.52389e-35
TraesCS4D02G327900	1.19495	0.00183626	1.01404	0.00957578	-2.03279	0.000105643	-0.180903	0.625181	-3.22774	2.22868e-10	-3.04684	3.22204e-09
TraesCS4D02G328000	-0.0111658	0.890531	0.150462	0.0671379	-0.456409	7.89845e-08	0.161628	0.0480338	-0.445243	1.40879e-07	-0.60687	1.34173e-12
TraesCS5D02G030000	0.0771205	0.0268923	0.170575	1.17062e-06	0.343515	9.49773e-23	0.0934547	0.00750842	0.266394	2.12018e-14	0.172939	8.34957e-07
TraesCS5D02G268900	1.74654	0.618618	0	1	3.76848	0.269589	-1.41483	0.686759	2.02193	0.547089	3.43677	0.314023
TraesCS5D02G418100	3.45243	5.78734e-18	3.96031	3.73975e-23	3.31239	2.64202e-16	0.507888	0.0794854	-0.140036	0.636547	-0.647924	0.028689
TraesCS5D02G440700	-1.8652	2.1444e-23	0.158481	0.306425	2.89037	4.03344e-97	2.02368	8.83162e-27	4.75557	7.54926e-162	2.73188	3.81918e-84
TraesCS7D02G192500	-0.356016	0.359682	0.232328	0.548635	-1.2696	0.0024747	0.588345	0.13126	-0.913588	0.0303282	-1.50193	0.000355674
TraesCS7D02G479100	-0.44757	2.0621e-11	1.04557	4.19166e-60	1.84694	1.55775e-190	1.49314	8.85029e-117	2.29451	3.52603e-283	0.801364	1.21537e-39
TraesCS7D02G514500	-0.649873	1.39816e-16	-0.675183	6.92136e-17	0.488909	1.83844e-10	-0.0253097	0.758676	1.13878	6.18596e-48	1.16409	2.39867e-47
TraesCS1A02G016800	-0.75131	4.65087e-26	-1.62584	1.91422e-101	0.761437	6.45324e-28	-0.874529	7.41249e-30	1.51275	9.21497e-102	2.38728	3.4216e-219
TraesCS1A02G017300	0.0897455	0.433201	-1.8867	1.25104e-43	1.8869	2.06826e-64	-1.97645	2.91818e-48	1.79715	1.24517e-59	3.7736	8.64933e-178
TraesCS1A02G017400	0.675856	0.320503	-1.66516	0.0810095	3.54533	2.39916e-08	-2.34101	0.0112837	2.86948	1.09021e-06	5.21049	5.03552e-09
TraesCS1A02G186100	1.51244	1.27508e-54	2.18761	1.92997e-113	3.08746	4.41389e-232	0.675178	7.60148e-15	1.57503	8.83367e-77	0.899851	1.37889e-26
TraesCS1A02G186200	3.4457	2.99413e-27	4.27681	2.11231e-41	0.911919	0.0115672	0.831105	0.000457812	-2.53378	5.56706e-18	-3.36489	8.98618e-31
TraesCS1A02G186300	-0.508239	0.00941097	-0.0705449	0.719287	0.978333	1.74584e-07	0.437694	0.0285529	1.48657	7.18052e-15	1.04888	4.40418e-08
TraesCS1A02G186400	0.892745	0.0482182	-1.63763	0.00413398	2.28037	2.66055e-07	-2.53037	5.09059e-06	1.38763	0.00100719	3.918	8.41285e-13
TraesCS1A02G186500	0.0828593	0.130005	0.845077	2.29093e-54	1.37556	4.38458e-143	0.762218	4.85942e-45	1.2927	5.09286e-128	0.530479	2.96312e-23
TraesCS1A02G186600	-0.200117	0.0333993	-2.82111	1.90984e-103	1.9313	6.68747e-102	-2.62099	2.23698e-89	2.13142	3.59952e-123	4.75241	4.92327e-302
TraesCS1A02G186700	0.530949	6.82156e-32	-0.17939	8.53604e-05	0.46867	5.01419e-25	-0.710339	4.2058e-55	-0.062279	0.167583	0.64806	8.22573e-46
TraesCS1A02G186800	0.24268	0.126278	0.478638	0.00290962	2.72808	1.33234e-73	0.235959	0.133645	2.4854	1.89959e-64	2.24944	1.3252e-51
TraesCS1A02G187000	-0.325227	3.98826e-06	0.296	2.4111e-05	1.10874	2.53157e-59	0.621227	1.40805e-18	1.43397	1.81931e-96	0.81274	1.37084e-32
TraesCS1A02G258500	5.55076	5.59147e-34	6.94008	1.63361e-52	5.31374	5.76633e-31	1.38932	5.85988e-13	-0.237016	0.241721	-1.62634	2.62333e-16
TraesCS2A02G144300	-0.524978	0.307699	0.112112	0.826025	1.92767	5.83643e-05	0.637089	0.220883	2.45265	5.75691e-07	1.81556	0.000185946
TraesCS2A02G218700	-0.904512	7.67918e-12	-0.926246	7.08886e-12	-0.279973	0.0333737	-0.0217336	0.874764	0.624539	3.40284e-06	0.646273	2.53825e-06
TraesCS2A02G504300	-1.19121	0.410832	-0.702806	0.627463	-3.89776	0.0312892	0.488407	0.742196	-2.70655	0.141189	-3.19496	0.0823768
TraesCS2A02G544400	-1.0309	0.665042	-1.50669	0.526871	2.70303	0.202023	-0.475792	0.846013	3.73393	0.0890396	4.20972	0.0552165
TraesCS2A02G577900	-0.394323	0.755811	-0.383785	0.775069	4.57059	1.69757e-05	0.0105385	0.993868	4.96491	6.14528e-06	4.95437	2.86004e-05
TraesCS2A02G578000	-0.545432	0.000722297	-0.887794	7.48747e-08	-1.73035	7.50774e-24	-0.342363	0.0393773	-1.18492	7.264e-12	-0.842557	1.7844e-06
TraesCS2A02G578200	1.26495	0.000676146	0.730879	0.0737116	5.86557	1.53868e-68	-0.534067	0.124087	4.60062	9.8221e-72	5.13469	1.26042e-62
TraesCS2A02G578300	0	1	0	1	3.12839	0.468086	0	1	3.28269	0.44644	2.79669	0.516568
TraesCS2A02G578400	-0.655581	1.26189e-22	-0.187482	0.00514568	0.806426	5.62646e-35	0.468099	5.71717e-12	1.46201	1.28848e-107	0.993908	1.10875e-50
TraesCS3A02G021200	-0.0159696	0.941422	0.579641	0.00728016	1.94567	2.83553e-21	0.595611	0.00541412	1.96164	5.59196e-22	1.36603	1.39532e-11
TraesCS3A02G129800	0.24689	0.246906	0.500989	0.0196679	0.194537	0.370972	0.254099	0.230464	-0.0523535	0.807264	-0.306452	0.156243
TraesCS3A02G260800	-0.484161	0.0114973	1.31669	7.22254e-14	3.67941	1.04385e-107	1.80085	3.22135e-23	4.16357	1.89535e-128	2.36272	2.27649e-52
TraesCS3A02G376700	4.43046	0.000671543	6.9144	6.48303e-08	6.44433	5.03725e-07	2.48394	1.51945e-05	2.01387	0.000531608	-0.470071	0.372127
TraesCS3A02G379200	0.669484	0.0261155	0.548214	0.0744824	1.74295	4.34628e-09	-0.12127	0.683929	1.07346	0.000184589	1.19473	4.76724e-05
TraesCS3A02G437400	2.43419	2.56045e-07	3.03344	1.22726e-10	3.33878	1.10146e-12	0.599247	0.132531	0.904591	0.0222721	0.305344	0.438961
TraesCS3A02G437500	-0.799529	0.730001	-4.07842	0.109023	-4.05763	0.11084	-3.27889	0.201058	-3.2581	0.203929	0	1
TraesCS3A02G437600	0.673537	0.800039	3.38312	0.174676	-0.609256	0.822386	2.70958	0.265312	-1.28279	0.629511	-3.99237	0.10921
TraesCS3A02G459500	-0.0551272	0.659846	-0.096979	0.451768	0.8552	3.87244e-12	-0.0418518	0.744285	0.910327	1.1245e-13	0.952179	4.73556e-14
TraesCS3A02G487700	-0.200356	0.00453985	-0.496636	1.14126e-11	0.803996	6.25948e-31	-0.29628	5.27819e-05	1.00435	3.8061e-47	1.30063	1.88377e-72
TraesCS3A02G488200	-0.887786	0.011867	-2.20017	6.73128e-06	4.04772	3.78837e-46	-1.31238	0.00965852	4.9355	1.67389e-55	6.24789	1.04002e-41
TraesCS3A02G488300	-2.41835	0.219226	-2.89414	0.14148	2.85596	0.0741663	-0.475792	0.829106	5.27431	0.0050745	5.7501	0.00225018
TraesCS4A02G008400	0.215752	0.304398	-1.09218	1.35369e-06	1.42818	5.7967e-12	-1.30793	5.43208e-09	1.21243	3.60757e-09	2.52036	6.2265e-30
TraesCS4A02G429800	-1.27811	6.91198e-06	-3.1523	1.14148e-19	-6.5229	2.04168e-17	-1.87419	1.27779e-07	-5.24479	1.06434e-11	-3.3706	2.34576e-05
TraesCS4A02G435300	0.229021	0.392511	0.648887	0.0159881	3.47419	7.69337e-48	0.419866	0.105632	3.24517	5.2884e-46	2.82531	8.9236e-35
TraesCS4A02G454700	-4.45395	0.135574	-3.96795	0.183643	-3.94716	0.18595	0	1	0	1	0	1
TraesCS4A02G454800	0.727465	6.3174e-30	1.02206	2.94895e-57	1.56232	5.50463e-132	0.294595	3.68207e-06	0.834853	1.60851e-39	0.540258	1.85302e-17
TraesCS4A02G455000	0.288545	0.0101085	0.623275	3.21915e-08	0.628413	2.52693e-08	0.33473	0.00254886	0.339868	0.00219901	0.00513783	0.963263
TraesCS4A02G469800	-0.270596	0.210565	-1.00413	0.000111724	4.25956	2.91582e-125	-0.733536	0.00514912	4.53015	2.3449e-136	5.26369	1.7714e-113
TraesCS5A02G021700	0.566795	0.00983675	2.35936	2.17793e-29	3.04363	6.56543e-49	1.79256	1.5475e-19	2.47684	9.21622e-37	0.684276	0.000205488
TraesCS5A02G143500	1.82689	3.74255e-08	2.16515	9.16512e-11	4.70771	2.58373e-50	0.338263	0.210266	2.88083	1.68102e-31	2.54256	2.24084e-24
TraesCS5A02G190900	1.65287	5.0544e-23	2.10557	3.0752e-36	2.92295	1.0862e-71	0.452701	0.00135275	1.27008	1.10862e-20	0.817375	2.10483e-09
TraesCS5A02G247500	0.252394	0.541279	0.90077	0.0284493	0.273401	0.515752	0.648376	0.109292	0.0210068	0.959589	-0.627369	0.12833
TraesCS5A02G374800	0.0551898	0.933481	0.212672	0.751119	3.10066	8.5513e-07	0.157482	0.812762	3.04547	1.05228e-06	2.88799	5.18671e-06
TraesCS5A02G424000	1.34613	0.372605	0.972392	0.528716	5.67365	0.000113754	-0.373737	0.79884	4.32753	0.0018365	4.70126	0.000975305
TraesCS5A02G424100	0.230538	3.03474e-08	0.810735	6.8594e-85	0.133315	0.00164607	0.580197	2.79941e-45	-0.0972232	0.0203932	-0.67742	5.57217e-59
TraesCS6A02G139000	-1.29466	1.76443e-10	-1.57279	1.38267e-13	-0.762852	0.000167055	-0.278131	0.205945	0.531803	0.0114492	0.809934	0.000226908
TraesCS6A02G139100	1.75324	1.46633e-09	1.15454	0.00010245	2.75108	1.25346e-21	-0.598695	0.0318075	0.997844	0.000207817	1.59654	8.10655e-09
TraesCS7A02G021900	0.360191	0.0553782	0.0106189	0.958153	4.62758	3.40861e-164	-0.349572	0.0725274	4.26739	2.12974e-156	4.61696	2.7184e-150
TraesCS7A02G034300	0.754161	5.25625e-55	1.16813	4.16852e-129	2.06818	0	0.413973	3.2054e-18	1.31401	5.48708e-171	0.900042	4.07401e-81
TraesCS7A02G034500	-1.58752	2.60423e-23	-1.79634	4.54613e-27	-2.53887	1.16544e-45	-0.208815	0.229277	-0.951341	2.92618e-07	-0.742526	0.000107113
TraesCS7A02G049400	-1.52597	1.36922e-31	-1.61448	1.93738e-32	1.95584	5.48847e-60	-0.0885095	0.535749	3.48181	1.79009e-164	3.57032	2.48911e-158
TraesCS7A02G059900	1.0749	0.00479282	0.763562	0.049305	-2.05835	1.99055e-05	-0.311334	0.406338	-3.13324	3.09834e-11	-2.82191	3.47033e-09
TraesCS7A02G083700	-0.953866	4.17812e-23	-1.19338	3.1609e-32	0.658091	1.05137e-12	-0.23951	0.021147	1.61196	7.566e-64	1.85147	3.34767e-76
TraesCS7A02G129500	-0.217949	0.686853	-2.72897	0.00023975	0.810445	0.126292	-2.51102	0.000739126	1.02839	0.0530599	3.53941	1.53952e-06
TraesCS7A02G132000	-0.402894	0.262673	-0.801603	0.0292507	3.23421	3.20956e-20	-0.398709	0.280153	3.63711	6.13003e-25	4.03581	4.80774e-29
TraesCS7A02G187300	1.65375	0.107345	0.994143	0.339774	3.26468	0.00137981	-0.659609	0.514308	1.61093	0.103689	2.27054	0.0238552
TraesCS7A02G374900	-0.0707578	0.953967	-0.503208	0.688151	-1.51798	0.248056	-0.43245	0.729771	-1.44722	0.270158	-1.01477	0.448403
TraesCS7A02G477900	0.14937	0.0640198	1.05832	5.00475e-40	-3.22063	2.02278e-178	0.908947	1.86949e-30	-3.37	8.64889e-197	-4.27895	0
TraesCS1B02G021100	-0.235385	0.278491	-2.37534	5.37803e-16	1.55744	4.9825e-14	-2.13996	3.28422e-13	1.79283	6.18135e-18	3.93278	5.86914e-43
TraesCS1B02G194000	0.971731	0.0165206	1.53311	0.000149466	1.58825	8.40535e-05	0.561384	0.139265	0.61652	0.104009	0.055136	0.884062
TraesCS1B02G194100	-0.947663	3.61589e-13	-0.361851	0.00520607	0.383548	0.00210579	0.585812	1.38676e-05	1.33121	1.56049e-24	0.745399	8.29498e-09
TraesCS1B02G194300	0.218727	0.00829367	1.28243	6.11441e-56	1.68928	2.44186e-97	1.06371	2.77109e-40	1.47056	1.0957e-76	0.40685	1.70534e-07
TraesCS1B02G194400	0.286315	0.203607	0.305146	0.183985	0.833446	0.000210352	0.0188311	0.933447	0.547131	0.013134	0.5283	0.018964
TraesCS1B02G194500	-0.388853	0.0747747	-0.307285	0.167522	-1.61038	8.52952e-11	0.0815681	0.716559	-1.22153	1.02037e-06	-1.3031	2.82416e-07
TraesCS1B02G194600	-0.094345	0.715328	-2.88761	1.64827e-15	1.09411	1.55554e-05	-2.79327	1.21829e-14	1.18846	2.54398e-06	3.98173	1.05684e-28
TraesCS1B02G194700	1.26928	9.83167e-115	0.99116	1.92072e-68	1.92075	2.57501e-261	-0.278117	3.17106e-07	0.651476	2.20178e-34	0.929592	8.54533e-66
TraesCS1B02G194800	0.215085	0.943514	-2.06881	0.51399	0.320922	0.916599	-2.2839	0.467645	0.105837	0.972212	2.38973	0.451294
TraesCS1B02G194900	-0.335994	1.59842e-07	0.551216	3.09231e-18	1.003	1.07444e-57	0.88721	4.24659e-44	1.33899	4.24158e-100	0.451784	3.84711e-13
TraesCS1B02G269100	3.11281	2.67576e-119	3.75591	1.8227e-173	1.62393	1.91363e-30	0.643098	3.60071e-09	-1.48888	3.15671e-36	-2.13198	8.78728e-73
TraesCS2B02G244100	-1.02381	2.06551e-10	-0.0702638	0.649284	2.70929	7.43462e-85	0.953541	7.66587e-09	3.7331	7.79832e-136	2.77956	1.22892e-83
TraesCS2B02G532600	0.584452	0.00591587	0.52291	0.0150803	-0.00243005	0.991155	-0.0615416	0.770605	-0.586882	0.00638612	-0.52534	0.015942
TraesCS2B02G574500	-0.297361	0.594089	0.687517	0.194437	4.65083	4.6296e-24	0.984878	0.067703	4.94819	6.87469e-26	3.96331	1.09727e-19
TraesCS2B02G574600	0.446079	0.260654	-0.459738	0.288022	3.01776	1.52783e-15	-0.905818	0.0316589	2.57168	2.01269e-12	3.4775	8.23993e-18
TraesCS2B02G609400	-0.519565	1.51765e-30	-0.112397	0.013255	0.754724	9.44456e-66	0.407168	8.55904e-19	1.27429	9.72586e-179	0.867121	2.92137e-83
TraesCS2B02G609500	-1.14892	3.95668e-32	0.250205	0.0060168	2.25375	1.936e-153	1.39913	1.81223e-46	3.40267	2.5341e-296	2.00354	1.71905e-120
TraesCS2B02G609600	-0.240415	0.180028	-0.780253	0.000108395	4.06702	2.00125e-148	-0.539837	0.00775019	4.30744	3.87414e-163	4.84728	1.74137e-154
TraesCS3B02G025000	-0.778549	8.46975e-22	-0.862826	9.17701e-26	0.330991	3.82672e-05	-0.0842773	0.309866	1.10954	1.55503e-42	1.19382	9.58684e-48
TraesCS3B02G234100	-0.884582	2.2208e-31	-0.28074	0.000197252	1.12724	1.35551e-55	0.603843	8.85346e-15	2.01182	2.68027e-161	1.40798	4.49829e-81
TraesCS3B02G471500	0.342801	0.238528	0.187862	0.531441	1.95404	3.92742e-12	-0.15494	0.597364	1.61124	4.22901e-09	1.76618	5.11444e-10
TraesCS3B02G471600	1.30188	0.0279437	1.80784	0.0022549	2.41378	3.46397e-05	0.505962	0.351275	1.1119	0.0369917	0.605939	0.255261
TraesCS3B02G471900	-0.164994	0.724092	-1.03686	0.0387751	1.62838	0.000332306	-0.871861	0.0823683	1.79338	7.79384e-05	2.66524	5.09163e-08
TraesCS3B02G499200	0.921745	0.362069	0.382223	0.716823	1.85678	0.0634658	-0.539522	0.592575	0.935032	0.326196	1.47455	0.139286
TraesCS3B02G535300	0.861521	3.4765e-26	1.16599	3.48795e-46	0.75979	4.08338e-20	0.304467	0.000118236	-0.101731	0.204125	-0.406198	4.44292e-07
TraesCS3B02G535700	-0.305667	0.00608011	0.0868394	0.437695	0.812245	8.68538e-14	0.392506	0.000491365	1.11791	2.03746e-24	0.725406	4.45914e-11
TraesCS3B02G536100	-0.788539	1.02701e-21	-1.74344	5.76103e-72	2.89369	0	-0.954901	1.29017e-21	3.68223	0	4.63713	0
TraesCS3B02G538500	-1.37314	0.0857892	-4.09128	0.00239941	2.62689	8.59251e-05	-2.71814	0.0507615	4.00003	1.08843e-07	6.71817	3.65342e-07
TraesCS3B02G538600	-0.813199	3.20672e-26	-1.04578	4.21374e-39	0.128176	0.0893275	-0.232584	0.00441696	0.941375	4.08661e-34	1.17396	3.22824e-48
TraesCS3B02G538800	-1.15612	8.03475e-29	-1.41924	1.17155e-38	-0.596812	8.08192e-09	-0.263116	0.0198164	0.559312	1.95281e-07	0.822428	2.88537e-13
TraesCS3B02G539000	0.192694	0.528114	1.05098	0.000489786	-0.585454	0.0754119	0.858282	0.00381649	-0.778148	0.0166241	-1.63643	3.4879e-07
TraesCS3B02G539100	0.469097	2.6317e-31	0.970356	4.04539e-128	0.842147	1.3145e-96	0.50126	3.37401e-36	0.373051	1.05053e-20	-0.128209	0.00133885
TraesCS3B02G539300	0.902244	1.09484e-05	1.58743	7.17416e-15	1.76275	4.16416e-18	0.685186	0.000414912	0.860501	8.47943e-06	0.175315	0.361228
TraesCS3B02G540100	-0.699655	1.02772e-24	-0.475104	4.98123e-12	-1.3219	1.39341e-75	0.224551	0.00129212	-0.622246	1.26522e-17	-0.846797	8.47295e-31
TraesCS3B02G540200	-1.5169	1.26707e-168	-1.5024	2.28218e-160	-0.427962	2.38122e-15	0.0144926	0.799435	1.08893	6.81813e-86	1.07444	3.50211e-81
TraesCS3B02G540700	3.92336	0.0244292	6.73223	6.88079e-05	0	1	2.80887	0.0310581	-3.57083	0.0405501	-6.3797	0.000161996
TraesCS3B02G571100	-0.130621	0.946873	-0.655129	0.746359	-3.50158	0.116375	-0.524508	0.795574	-3.37096	0.130484	-2.84645	0.213218
TraesCS3B02G571200	0.933472	0.108132	1.55786	0.00713741	-4.87312	0.000186463	0.624391	0.260493	-5.80659	7.16425e-06	-6.43098	6.5315e-07
TraesCS4B02G225200	1.52272	6.13573e-06	1.12311	0.00109451	1.05851	0.00215067	-0.399612	0.21871	-0.464216	0.154352	-0.0646044	0.846341
TraesCS4B02G274400	-0.558084	6.96183e-09	-0.590256	1.63263e-09	-1.11632	7.58621e-29	-0.0321714	0.744536	-0.558233	3.25588e-08	-0.526062	2.82355e-07
TraesCS4B02G296500	-0.118284	0.25826	-0.75563	2.64993e-11	0.906173	7.93752e-19	-0.637345	1.79908e-08	1.02446	1.05111e-23	1.6618	1.17935e-50
TraesCS5B02G018400	-0.226746	0.141466	0.570847	0.000175307	0.283191	0.0662574	0.797593	1.74743e-07	0.509937	0.000980382	-0.287656	0.0594944
TraesCS5B02G142500	0.155843	0.255053	0.340995	0.0142363	2.91254	1.36408e-112	0.185152	0.176057	2.7567	6.31292e-105	2.57154	2.61303e-88
TraesCS5B02G192400	1.1557	1.92208e-06	1.42775	5.39537e-09	2.65133	3.40739e-29	0.27205	0.227674	1.49563	4.8599e-12	1.22358	2.20357e-08
TraesCS5B02G426300	1.89425	1.58065e-20	3.32986	3.77832e-64	6.09983	1.45776e-225	1.43561	9.44685e-24	4.20558	1.15568e-217	2.76997	3.58058e-113
TraesCS5B02G426400	0.724471	1.78405e-66	1.92126	0	0.676603	5.45433e-56	1.19678	2.72831e-199	-0.0478675	0.247335	-1.24465	5.3854e-206
TraesCS6B02G167300	0.540266	3.37701e-08	0.0600981	0.5584	1.90474	1.66995e-88	-0.480168	1.42424e-06	1.36447	1.32917e-49	1.84464	3.35415e-80
TraesCS6B02G167400	0.246678	0.0473782	-0.704855	9.46875e-08	1.66075	4.67125e-42	-0.951532	3.2985e-13	1.41407	1.05835e-31	2.3656	1.42285e-75
TraesCS6B02G167500	1.74166	0.00120079	-0.602795	0.301299	-0.229965	0.687707	-2.34446	3.16507e-05	-1.97163	0.000353969	0.372829	0.531787
TraesCS6B02G167600	1.54241	0.000875371	0.335355	0.473637	2.24375	1.27478e-06	-1.20705	0.00920423	0.70134	0.12624	1.90839	3.79045e-05
TraesCS7B02G029300	-0.76046	0.299788	0.00402142	0.995561	0.240788	0.736645	0.764481	0.303683	1.00125	0.174029	0.236766	0.744354
TraesCS7B02G032700	-1.11605	0.723577	0.331743	0.916272	3.54336	0.231821	1.44779	0.646372	4.65941	0.115889	3.21162	0.278488
TraesCS7B02G057500	-0.154247	0.972082	-0.630036	0.886329	0.352542	0.936246	-0.475789	0.914035	0.506789	0.908458	0.982578	0.823586
TraesCS7B02G380300	0.0273513	0.758868	0.442495	7.21788e-07	-1.99255	2.25493e-78	0.415144	2.91366e-06	-2.0199	3.78695e-81	-2.43504	1.05161e-116
TraesCS1D02G014500	-1.10359	4.06045e-05	-2.93377	1.87939e-15	2.44282	4.24469e-24	-1.83018	1.40967e-06	3.54641	2.21645e-43	5.37659	2.42076e-50
TraesCS1D02G017000	0	1	0	1	5.50186	0.196477	0	1	5.65617	0.184228	5.17018	0.224841
TraesCS1D02G189600	-0.873212	3.50092e-11	-0.93314	5.70656e-12	0.885042	3.24073e-12	-0.0599278	0.665384	1.75825	1.70411e-41	1.81818	6.25363e-42
TraesCS1D02G189700	-0.220252	0.453751	-1.12606	0.000732099	2.70248	3.02738e-23	-0.905812	0.00676228	2.92273	1.11303e-26	3.82854	6.54589e-34
TraesCS1D02G189800	0.772802	1.13362e-74	0.411835	7.00924e-22	0.97913	8.56504e-118	-0.360967	1.17998e-17	0.206328	7.89693e-07	0.567295	6.73636e-41
TraesCS1D02G189900	-0.355465	0.0191692	-0.415425	0.0077307	0.800361	6.86244e-08	-0.0599604	0.70278	1.15583	1.10756e-14	1.21579	2.74192e-15
TraesCS1D02G190000	-0.0701028	0.230031	0.534383	3.9411e-20	1.08808	1.4178e-80	0.604486	1.82474e-25	1.15818	1.21669e-91	0.553699	1.82923e-22
TraesCS1D02G190100	1.057	1.49707e-38	1.40353	8.9437e-66	2.79517	4.17696e-279	0.346527	3.49463e-06	1.73818	1.58958e-133	1.39165	7.53984e-85
TraesCS1D02G190200	4.74629	2.89425e-05	4.42983	0.000111567	6.75902	1.87624e-09	-0.316458	0.565402	2.01273	6.56722e-05	2.32919	1.08666e-05
TraesCS1D02G190300	0.0677123	0.791147	0.0581881	0.823694	1.28339	2.95793e-07	-0.00952411	0.970662	1.21568	9.5476e-07	1.2252	1.37073e-06
TraesCS1D02G190500	1.62931	9.44599e-12	1.48778	1.14668e-09	1.30265	1.28797e-07	-0.141528	0.519149	-0.326658	0.141329	-0.18513	0.416386
TraesCS1D02G190600	0.893679	3.20077e-11	1.00004	1.86573e-13	-0.363801	0.0117724	0.106359	0.41815	-1.25748	2.9205e-19	-1.36384	5.0524e-22
TraesCS1D02G191100	0.10795	0.316885	1.30736	4.33772e-35	2.20374	4.06764e-99	1.19941	2.23334e-30	2.09579	1.10276e-91	0.896376	7.16856e-19
TraesCS1D02G257800	4.30302	4.77613e-76	5.21742	9.69107e-112	3.93368	2.3043e-62	0.9144	1.37565e-10	-0.369338	0.0128786	-1.28374	2.61052e-18
TraesCS2D02G224700	-0.881441	1.40961e-15	-0.778626	3.46709e-12	0.0612903	0.574131	0.102814	0.36661	0.942731	2.11655e-17	0.839917	8.65101e-14
TraesCS2D02G504900	5.60493	0.000119252	5.13943	0.000463992	1.25819	0.476199	-0.465495	0.603572	-4.34673	0.00107643	-3.88124	0.00382255
TraesCS2D02G545400	1.25123	6.42918e-10	1.0968	2.12062e-07	4.38106	1.02049e-119	-0.15442	0.400951	3.12984	1.12375e-88	3.28426	5.6049e-85
TraesCS2D02G589300	-0.66187	8.1825e-09	-0.366685	0.00153695	1.17336	2.87714e-26	0.295185	0.012174	1.83523	1.37339e-59	1.54004	8.41183e-42
TraesCS2D02G589400	-0.918502	5.61972e-21	0.241926	0.00917402	2.97716	3.53194e-266	1.16043	3.30604e-32	3.89567	0	2.73524	3.58146e-222
TraesCS2D02G589500	-1.1462	1.37444e-11	-0.0442863	0.781342	2.59665	2.81885e-74	1.10191	2.22679e-10	3.74285	6.10443e-124	2.64094	7.10012e-72
TraesCS2D02G589600	-0.735729	3.75647e-45	-0.296026	1.52617e-08	0.69115	2.56824e-43	0.439703	2.7707e-16	1.42688	1.58e-168	0.987176	2.94174e-81
TraesCS3D02G025800	0.00821291	0.882644	-0.201873	0.000458987	2.02108	0	-0.210086	0.000242559	2.01287	0	2.22296	0
TraesCS3D02G130700	0.0962617	0.348848	-0.603741	1.85261e-08	-1.73682	4.39819e-50	-0.700002	5.28007e-11	-1.83308	3.75212e-56	-1.13308	4.14665e-21
TraesCS3D02G261100	-0.248082	0.155549	-0.183123	0.309384	2.00558	6.78172e-35	0.0649586	0.719906	2.25367	4.83449e-43	2.18871	4.53271e-38
TraesCS3D02G369600	2.36495	1.98152e-14	3.8176	1.59305e-36	3.63134	5.5262e-33	1.45265	2.16683e-10	1.26639	3.78808e-08	-0.186263	0.399901
TraesCS3D02G429600	0.833532	0.181365	-0.096247	0.880033	3.55972	7.90316e-09	-0.929779	0.139639	2.72619	7.41745e-06	3.65597	4.34095e-09
TraesCS3D02G429700	0.895577	6.92841e-08	0.990463	5.12208e-09	2.05043	9.76168e-37	0.0948857	0.54643	1.15485	9.73189e-15	1.05997	4.24537e-12
TraesCS3D02G429800	1.66149	1.86966e-05	1.74395	9.39164e-06	2.12837	4.35159e-08	0.0824521	0.813291	0.466877	0.174138	0.384425	0.271532
TraesCS3D02G429900	1.17541	0.149339	1.03863	0.215383	3.85116	8.05635e-07	-0.136781	0.859296	2.67575	0.000158466	2.81253	0.000129609
TraesCS3D02G430200	-0.678012	0.0515633	-1.32014	0.000382902	1.0283	0.00224556	-0.64213	0.0889469	1.70632	6.4969e-07	2.34845	1.50922e-10
TraesCS3D02G452100	0.263494	0.155594	0.397956	0.0348464	1.81829	4.56459e-24	0.134462	0.467044	1.5548	9.20279e-19	1.42034	2.10756e-15
TraesCS3D02G482700	0.597072	1.14605e-10	1.0451	1.8543e-29	1.66599	1.25831e-74	0.448031	5.734e-07	1.06892	5.62636e-34	0.620891	1.80613e-12
TraesCS3D02G483000	1.09662	1.51023e-07	-1.20627	4.3197e-05	5.18924	8.13977e-161	-2.30289	9.92058e-17	4.09262	3.67589e-138	6.39551	7.89217e-129
TraesCS3D02G485700	-1.80303	4.02418e-05	-0.407084	0.323795	-0.773215	0.0669554	1.39595	0.00195194	1.02982	0.0249775	-0.366131	0.398976
TraesCS3D02G486100	-2.47193	9.72899e-209	-2.94001	4.73653e-246	-0.308813	3.12107e-05	-0.468078	5.95603e-07	2.16312	1.6637e-156	2.6312	1.52326e-193
TraesCS3D02G486200	-0.280651	0.000305673	-1.00831	1.61208e-35	-0.738117	3.28821e-20	-0.72766	3.44985e-19	-0.457466	1.25201e-08	0.270194	0.00122733
TraesCS3D02G486800	0.699295	5.39726e-08	1.73669	1.73607e-42	0.220435	0.0974961	1.0374	4.04344e-17	-0.47886	0.000215009	-1.51626	2.10236e-32
TraesCS3D02G487200	-1.02935	1.60015e-17	-1.90766	1.51441e-46	-2.0757	1.01564e-52	-0.878307	1.25063e-10	-1.04635	5.45567e-14	-0.168039	0.262526
TraesCS3D02G487300	-0.915922	1.28343e-146	-0.993293	2.71966e-169	-2.09315	0	-0.0773713	0.0319403	-1.17723	9.12262e-221	-1.09986	4.22788e-190
TraesCS3D02G487400	0.561372	0.0154903	0.985688	2.20878e-05	-0.0743301	0.760372	0.424315	0.0602398	-0.635702	0.00743943	-1.06002	8.3794e-06
TraesCS3D02G512200	-0.289664	0.597877	0.473148	0.385019	-1.03974	0.0747607	0.762813	0.163148	-0.750072	0.200284	-1.51288	0.00926865
TraesCS4D02G225800	1.64214	2.70407e-44	1.81594	7.58869e-53	2.14995	1.22319e-74	0.173791	0.105239	0.507808	1.70108e-06	0.334017	0.00184792
TraesCS4D02G295400	-0.209631	0.118668	-1.56269	2.06567e-23	0.91099	3.59919e-12	-1.35306	6.96678e-18	1.12062	1.49095e-17	2.47368	6.84569e-58
TraesCS5D02G027300	-0.0404783	0.803451	0.162153	0.325392	1.51898	4.14142e-22	0.202631	0.21674	1.55946	1.83953e-23	1.35683	1.1631e-17
TraesCS5D02G027500	1.27641	2.29214e-25	1.29443	2.36118e-25	1.76084	1.08094e-46	0.0180102	0.877006	0.484422	2.35142e-05	0.466412	6.19069e-05
TraesCS5D02G148500	0.0964476	0.580727	-0.522967	0.00602468	1.86939	2.07451e-29	-0.619415	0.000979528	1.77295	1.64858e-27	2.39236	2.4864e-40
TraesCS5D02G200100	0.209728	0.140738	1.19779	1.72479e-17	1.66407	1.01287e-32	0.988059	1.23038e-12	1.45435	6.03513e-26	0.466287	0.000627906
TraesCS5D02G254000	-0.347893	4.42019e-12	0.000652394	0.989681	0.42789	1.01318e-17	0.348545	6.16613e-12	0.775783	6.00346e-54	0.427238	2.176e-17
TraesCS5D02G384400	0.807495	0.833699	3.20091	0.390929	1.31429	0.732552	2.39342	0.521204	0.50679	0.895166	-1.88663	0.613096
TraesCS5D02G432600	2.48983	9.38957e-17	2.76101	6.68992e-20	7.11763	6.66093e-140	0.271176	0.156978	4.6278	9.79202e-187	4.35662	1.64137e-155
TraesCS5D02G432700	-0.33517	2.58582e-18	0.782441	3.19792e-94	0.63887	3.75877e-63	1.11761	7.9118e-189	0.97404	2.94743e-143	-0.143571	0.000146665
TraesCS6D02G127700	0.349051	1.99383e-05	0.58742	1.39122e-12	2.28241	7.01126e-188	0.23837	0.00305491	1.93336	1.02203e-144	1.69499	2.31061e-108
TraesCS6D02G127800	2.74192	1.69139e-57	3.31695	1.5388e-83	3.15113	4.3019e-75	0.575035	4.29307e-05	0.409217	0.00376596	-0.165818	0.239338
TraesCS7D02G019400	0.124375	0.386499	0.146752	0.320748	3.67843	2.33877e-167	0.0223772	0.877743	3.55405	1.55998e-162	3.53167	5.35126e-150
TraesCS7D02G030700	1.27672	9.65829e-89	1.33529	9.40256e-97	2.43993	0	0.0585764	0.358111	1.16321	1.26882e-74	1.10464	2.20469e-67
TraesCS7D02G030800	-0.185626	0.0491321	-0.468884	1.54159e-06	-1.36803	2.20939e-39	-0.283258	0.00372893	-1.18241	8.47043e-30	-0.89915	4.97514e-17
TraesCS7D02G044500	-0.641548	1.61256e-16	-0.172086	0.027088	1.9147	2.74963e-154	0.469463	4.05042e-09	2.55625	2.6825e-258	2.08679	1.76884e-172
TraesCS7D02G050800	-0.250205	0.0875228	-1.90541	1.85262e-31	-2.67601	3.28267e-51	-1.65521	4.64186e-24	-2.4258	2.87211e-42	-0.770593	6.06607e-05
TraesCS7D02G078700	-0.642021	2.61762e-38	-1.02342	3.25446e-91	0.119988	0.0151954	-0.381397	6.33727e-14	0.762009	5.90968e-53	1.14341	9.14348e-113
TraesCS7D02G131600	-0.715298	6.54831e-07	-0.0372847	0.793216	1.82926	2.20227e-42	0.678013	3.53982e-06	2.54456	1.35261e-75	1.86655	1.83899e-42
TraesCS7D02G188400	-0.511917	0.000999961	-0.794924	8.73729e-07	-0.359999	0.0227	-0.283006	0.0834365	0.151918	0.342064	0.434924	0.00871052
TraesCS7D02G465400	-0.442809	3.58433e-15	-0.835526	1.12143e-47	-2.41019	0	-0.392717	1.16691e-11	-1.96738	2.76241e-211	-1.57466	3.09706e-131
TraesCSU02G183000	0	1	0	1	2.76883	0.522484	0	1	2.92312	0.499587	2.43712	0.573509
TraesCSU02G184900	-0.765127	0.516185	-0.258052	0.82623	3.51683	0.000208317	0.507076	0.685113	4.28196	3.82617e-05	3.77488	0.000270179
TraesCSU02G234300	0.990078	0.0113799	1.18692	0.00261633	1.81993	2.77169e-06	0.196844	0.601219	0.829852	0.0250008	0.633007	0.0901937

## Sheet: Table S6
Table S6: Identification of differentially expressed genes between various salt concentration treatments and the control.
100 mM/CK			200 mM/CK			300 mM/CK
Total	Up	Down	Total	Up	Down	Total	Up	Down
TraesCS1A02G186200	TraesCS1A02G186200	TraesCS3A02G309000	TraesCS1A02G102700	TraesCS1A02G102700	TraesCS1A02G186600	TraesCS1A02G017400	TraesCS1A02G017400	TraesCS2D02G503200
TraesCS1A02G258500	TraesCS1A02G258500	TraesCS3A02G309100	TraesCS1A02G186100	TraesCS1A02G186100	TraesCS1B02G021100	TraesCS1A02G078800	TraesCS1A02G078800	TraesCS3B02G571200
TraesCS1B02G097400	TraesCS1B02G097400	TraesCS3D02G133100	TraesCS1A02G186200	TraesCS1A02G186200	TraesCS1B02G194600	TraesCS1A02G102700	TraesCS1A02G102700	TraesCS3D02G487200
TraesCS1B02G113600	TraesCS1B02G113600	TraesCS3D02G486100	TraesCS1A02G186600	TraesCS1A02G186600	TraesCS1D02G011800	TraesCS1A02G102900	TraesCS1A02G102900	TraesCS3D02G487300
TraesCS1B02G269100	TraesCS1B02G269100		TraesCS1A02G258500	TraesCS1A02G258500	TraesCS1D02G014500	TraesCS1A02G186100	TraesCS1A02G186100	TraesCS4A02G429800
TraesCS1D02G081200	TraesCS1D02G081200		TraesCS1B02G021100	TraesCS1B02G021100	TraesCS3A02G309000	TraesCS1A02G186400	TraesCS1A02G186400	TraesCS4D02G327700
TraesCS1D02G094800	TraesCS1D02G094800		TraesCS1B02G097200	TraesCS1B02G097200	TraesCS3A02G309100	TraesCS1A02G186800	TraesCS1A02G186800	TraesCS4D02G327900
TraesCS1D02G190200	TraesCS1D02G190200		TraesCS1B02G097400	TraesCS1B02G097400	TraesCS3A02G488200	TraesCS1A02G258500	TraesCS1A02G258500	TraesCS7A02G034500
TraesCS1D02G257800	TraesCS1D02G257800		TraesCS1B02G194600	TraesCS1B02G194600	TraesCS3B02G538500	TraesCS1B02G097400	TraesCS1B02G097400	TraesCS7A02G059900
TraesCS2D02G504900	TraesCS2D02G504900		TraesCS1B02G217700	TraesCS1B02G217700	TraesCS3D02G486100	TraesCS1B02G113500	TraesCS1B02G113500	TraesCS7A02G477900
TraesCS3A02G376700	TraesCS3A02G376700		TraesCS1B02G269100	TraesCS1B02G269100	TraesCS4A02G429800	TraesCS1B02G114400	TraesCS1B02G114400	TraesCS7D02G050800
TraesCS3A02G437400	TraesCS3A02G437400		TraesCS1D02G011800	TraesCS1D02G011800	TraesCS5B02G020900	TraesCS1D02G014500	TraesCS1D02G014500	TraesCS7D02G465400
TraesCS3D02G369600	TraesCS3D02G369600		TraesCS1D02G014500	TraesCS1D02G014500	TraesCS7A02G129500	TraesCS1D02G081200	TraesCS1D02G081200
TraesCS4B02G200100	TraesCS4B02G200100		TraesCS1D02G081200	TraesCS1D02G081200	TraesCSU02G231100	TraesCS1D02G094700	TraesCS1D02G094700
TraesCS4D02G201300	TraesCS4D02G201300		TraesCS1D02G094800	TraesCS1D02G094800		TraesCS1D02G094800	TraesCS1D02G094800
TraesCS5A02G502400	TraesCS5A02G502400		TraesCS1D02G190200	TraesCS1D02G190200		TraesCS1D02G095000	TraesCS1D02G095000
TraesCS5D02G418100	TraesCS5D02G418100		TraesCS1D02G257800	TraesCS1D02G257800		TraesCS1D02G189700	TraesCS1D02G189700
TraesCS5D02G432600	TraesCS5D02G432600		TraesCS2D02G504900	TraesCS2D02G504900		TraesCS1D02G190100	TraesCS1D02G190100
TraesCS6D02G127800	TraesCS6D02G127800		TraesCS3A02G309000	TraesCS3A02G309000		TraesCS1D02G190200	TraesCS1D02G190200
TraesCS3A02G309000			TraesCS3A02G309100	TraesCS3A02G309100		TraesCS1D02G191100	TraesCS1D02G191100
TraesCS3A02G309100			TraesCS3A02G376700	TraesCS3A02G376700		TraesCS1D02G257800	TraesCS1D02G257800
TraesCS3D02G133100			TraesCS3A02G437400	TraesCS3A02G437400		TraesCS2A02G045400	TraesCS2A02G045400
TraesCS3D02G486100			TraesCS3A02G488200	TraesCS3A02G488200		TraesCS2A02G577900	TraesCS2A02G577900
			TraesCS3B02G538500	TraesCS3B02G538500		TraesCS2A02G578200	TraesCS2A02G578200
			TraesCS3B02G540700	TraesCS3B02G540700		TraesCS2B02G244100	TraesCS2B02G244100
			TraesCS3D02G133200	TraesCS3D02G133200		TraesCS2B02G574500	TraesCS2B02G574500
			TraesCS3D02G369600	TraesCS3D02G369600		TraesCS2B02G574600	TraesCS2B02G574600
			TraesCS3D02G486100	TraesCS3D02G486100		TraesCS2B02G609500	TraesCS2B02G609500
			TraesCS4A02G103800	TraesCS4A02G103800		TraesCS2B02G609600	TraesCS2B02G609600
			TraesCS4A02G103900	TraesCS4A02G103900		TraesCS2D02G044100	TraesCS2D02G044100
			TraesCS4A02G429800	TraesCS4A02G429800		TraesCS2D02G400000	TraesCS2D02G400000
			TraesCS4B02G199700	TraesCS4B02G199700		TraesCS2D02G503200	TraesCS2D02G503200
			TraesCS4B02G200000	TraesCS4B02G200000		TraesCS2D02G545400	TraesCS2D02G545400
			TraesCS4B02G200100	TraesCS4B02G200100		TraesCS2D02G589400	TraesCS2D02G589400
			TraesCS4D02G201100	TraesCS4D02G201100		TraesCS2D02G589500	TraesCS2D02G589500
			TraesCS4D02G201200	TraesCS4D02G201200		TraesCS3A02G260800	TraesCS3A02G260800
			TraesCS4D02G201300	TraesCS4D02G201300		TraesCS3A02G376700	TraesCS3A02G376700
			TraesCS5A02G021700	TraesCS5A02G021700		TraesCS3A02G437400	TraesCS3A02G437400
			TraesCS5A02G143500	TraesCS5A02G143500		TraesCS3A02G488200	TraesCS3A02G488200
			TraesCS5A02G190900	TraesCS5A02G190900		TraesCS3B02G471600	TraesCS3B02G471600
			TraesCS5A02G432600	TraesCS5A02G432600		TraesCS3B02G490600	TraesCS3B02G490600
			TraesCS5A02G502400	TraesCS5A02G502400		TraesCS3B02G536100	TraesCS3B02G536100
			TraesCS5B02G020900	TraesCS5B02G020900		TraesCS3B02G538500	TraesCS3B02G538500
			TraesCS5B02G426300	TraesCS5B02G426300		TraesCS3B02G571200	TraesCS3B02G571200
			TraesCS5D02G418100	TraesCS5D02G418100		TraesCS3D02G025800	TraesCS3D02G025800
			TraesCS5D02G432600	TraesCS5D02G432600		TraesCS3D02G133100	TraesCS3D02G133100
			TraesCS6D02G127800	TraesCS6D02G127800		TraesCS3D02G133200	TraesCS3D02G133200
			TraesCS7A02G129500	TraesCS7A02G129500		TraesCS3D02G261100	TraesCS3D02G261100
			TraesCS7B02G096300	TraesCS7B02G096300		TraesCS3D02G369600	TraesCS3D02G369600
			TraesCSU02G231100	TraesCSU02G231100		TraesCS3D02G429600	TraesCS3D02G429600
			TraesCS1A02G186600			TraesCS3D02G429700	TraesCS3D02G429700
			TraesCS1B02G021100			TraesCS3D02G429800	TraesCS3D02G429800
			TraesCS1B02G194600			TraesCS3D02G429900	TraesCS3D02G429900
			TraesCS1D02G011800			TraesCS3D02G483000	TraesCS3D02G483000
			TraesCS1D02G014500			TraesCS3D02G487200	TraesCS3D02G487200
			TraesCS3A02G309000			TraesCS3D02G487300	TraesCS3D02G487300
			TraesCS3A02G309100			TraesCS4A02G103700	TraesCS4A02G103700
			TraesCS3A02G488200			TraesCS4A02G103900	TraesCS4A02G103900
			TraesCS3B02G538500			TraesCS4A02G429800	TraesCS4A02G429800
			TraesCS3D02G486100			TraesCS4A02G435300	TraesCS4A02G435300
			TraesCS4A02G429800			TraesCS4A02G469800	TraesCS4A02G469800
			TraesCS5B02G020900			TraesCS4B02G044400	TraesCS4B02G044400
			TraesCS7A02G129500			TraesCS4B02G200100	TraesCS4B02G200100
			TraesCSU02G231100			TraesCS4D02G200700	TraesCS4D02G200700
						TraesCS4D02G201100	TraesCS4D02G201100
						TraesCS4D02G201200	TraesCS4D02G201200
						TraesCS4D02G201300	TraesCS4D02G201300
						TraesCS4D02G225800	TraesCS4D02G225800
						TraesCS4D02G327700	TraesCS4D02G327700
						TraesCS4D02G327900	TraesCS4D02G327900
						TraesCS5A02G021700	TraesCS5A02G021700
						TraesCS5A02G024000	TraesCS5A02G024000
						TraesCS5A02G143500	TraesCS5A02G143500
						TraesCS5A02G190900	TraesCS5A02G190900
						TraesCS5A02G374800	TraesCS5A02G374800
						TraesCS5A02G424000	TraesCS5A02G424000
						TraesCS5A02G432600	TraesCS5A02G432600
						TraesCS5B02G142500	TraesCS5B02G142500
						TraesCS5B02G192400	TraesCS5B02G192400
						TraesCS5B02G426300	TraesCS5B02G426300
						TraesCS5B02G435000	TraesCS5B02G435000
						TraesCS5D02G418100	TraesCS5D02G418100
						TraesCS5D02G432600	TraesCS5D02G432600
						TraesCS5D02G440700	TraesCS5D02G440700
						TraesCS6A02G139100	TraesCS6A02G139100
						TraesCS6B02G167600	TraesCS6B02G167600
						TraesCS6D02G127700	TraesCS6D02G127700
						TraesCS6D02G127800	TraesCS6D02G127800
						TraesCS7A02G021900	TraesCS7A02G021900
						TraesCS7A02G034300	TraesCS7A02G034300
						TraesCS7A02G034500	TraesCS7A02G034500
						TraesCS7A02G059900	TraesCS7A02G059900
						TraesCS7A02G132000	TraesCS7A02G132000
						TraesCS7A02G187300	TraesCS7A02G187300
						TraesCS7A02G477900	TraesCS7A02G477900
						TraesCS7D02G019400	TraesCS7D02G019400
						TraesCS7D02G030700	TraesCS7D02G030700
						TraesCS7D02G050800	TraesCS7D02G050800
						TraesCS7D02G465400	TraesCS7D02G465400
						TraesCSU02G184900	TraesCSU02G184900
						TraesCS2D02G503200
						TraesCS3B02G571200
						TraesCS3D02G487200
						TraesCS3D02G487300
						TraesCS4A02G429800
						TraesCS4D02G327700
						TraesCS4D02G327900
						TraesCS7A02G034500
						TraesCS7A02G059900
						TraesCS7A02G477900
						TraesCS7D02G050800
						TraesCS7D02G465400

## Sheet: Table S7
Table S7: Identification of differentially expressed genes between various salt concentration treatments.
300 mM/200 mM			300 mM/100 mM			200 mM/100 mM
Total	Up	Down	Total	Up	Down	Total	Up	Down
TraesCS1A02G013900	TraesCS1A02G013900	TraesCS1A02G186200	TraesCS1A02G017400	TraesCS1A02G017400	TraesCS1A02G186200	TraesCS1A02G017400	TraesCS1A02G017400	TraesCS1A02G017400
TraesCS1A02G016800	TraesCS1A02G016800	TraesCS1A02G203900	TraesCS1A02G102900	TraesCS1A02G102900	TraesCS1A02G203900	TraesCS1A02G186400	TraesCS1A02G186400	TraesCS1A02G186400
TraesCS1A02G017300	TraesCS1A02G017300	TraesCS1B02G217700	TraesCS1A02G186200	TraesCS1A02G186200	TraesCS1B02G217700	TraesCS1A02G186600	TraesCS1A02G186600	TraesCS1A02G186600
TraesCS1A02G017400	TraesCS1A02G017400	TraesCS1B02G269100	TraesCS1A02G186600	TraesCS1A02G186600	TraesCS2D02G503200	TraesCS1B02G021100	TraesCS1B02G021100	TraesCS1B02G021100
TraesCS1A02G186200	TraesCS1A02G186200	TraesCS2D02G503200	TraesCS1A02G186800	TraesCS1A02G186800	TraesCS2D02G504900	TraesCS1B02G194600	TraesCS1B02G194600	TraesCS1B02G194600
TraesCS1A02G186400	TraesCS1A02G186400	TraesCS2D02G504900	TraesCS1A02G203900	TraesCS1A02G203900	TraesCS2D02G579500	TraesCS1D02G011800	TraesCS1D02G011800	TraesCS1D02G011800
TraesCS1A02G186600	TraesCS1A02G186600	TraesCS2D02G579500	TraesCS1B02G113500	TraesCS1B02G113500	TraesCS3B02G571200	TraesCS3A02G376700	TraesCS3A02G376700	TraesCS3D02G483000
TraesCS1A02G186800	TraesCS1A02G186800	TraesCS3B02G540700	TraesCS1B02G114400	TraesCS1B02G114400	TraesCS4A02G429800	TraesCS3D02G483000	TraesCS3D02G483000	TraesCS5B02G020900
TraesCS1A02G203900	TraesCS1A02G203900	TraesCS3B02G571200	TraesCS1B02G217700	TraesCS1B02G217700	TraesCS4B02G330800	TraesCS4A02G103900	TraesCS4A02G103900	TraesCS6B02G167500
TraesCS1B02G021100	TraesCS1B02G021100	TraesCS4A02G429800	TraesCS1D02G014500	TraesCS1D02G014500	TraesCS4B02G331000	TraesCS4B02G200000	TraesCS4B02G200000	TraesCS7A02G129500
TraesCS1B02G194600	TraesCS1B02G194600	TraesCS4B02G200100	TraesCS1D02G095000	TraesCS1D02G095000	TraesCS4D02G327700	TraesCS4B02G200100	TraesCS4B02G200100
TraesCS1B02G217700	TraesCS1B02G217700	TraesCS4B02G330800	TraesCS1D02G189700	TraesCS1D02G189700	TraesCS4D02G327900	TraesCS4D02G201100	TraesCS4D02G201100
TraesCS1B02G269100	TraesCS1B02G269100	TraesCS4B02G330900	TraesCS1D02G190200	TraesCS1D02G190200	TraesCS5A02G502300	TraesCS4D02G201200	TraesCS4D02G201200
TraesCS1D02G011800	TraesCS1D02G011800	TraesCS4B02G331000	TraesCS1D02G191100	TraesCS1D02G191100	TraesCS5A02G502400	TraesCS5A02G432600	TraesCS5A02G432600
TraesCS1D02G014500	TraesCS1D02G014500	TraesCS4D02G327700	TraesCS2A02G045400	TraesCS2A02G045400	TraesCS7A02G059900	TraesCS5B02G020900	TraesCS5B02G020900
TraesCS1D02G095000	TraesCS1D02G095000	TraesCS4D02G327900	TraesCS2A02G144300	TraesCS2A02G144300	TraesCS7A02G455000	TraesCS5D02G440700	TraesCS5D02G440700
TraesCS1D02G189700	TraesCS1D02G189700	TraesCS5A02G502300	TraesCS2A02G577900	TraesCS2A02G577900	TraesCS7A02G477900	TraesCS6B02G167500	TraesCS6B02G167500
TraesCS1D02G190200	TraesCS1D02G190200	TraesCS5A02G502400	TraesCS2A02G578200	TraesCS2A02G578200	TraesCS7B02G380300	TraesCS7A02G129500	TraesCS7A02G129500
TraesCS2A02G045400	TraesCS2A02G045400	TraesCS7A02G059900	TraesCS2B02G244100	TraesCS2B02G244100	TraesCS7D02G050800	TraesCS1A02G017400
TraesCS2A02G577900	TraesCS2A02G577900	TraesCS7A02G477900	TraesCS2B02G574500	TraesCS2B02G574500		TraesCS1A02G186400
TraesCS2A02G578200	TraesCS2A02G578200	TraesCS7B02G380300	TraesCS2B02G574600	TraesCS2B02G574600		TraesCS1A02G186600
TraesCS2B02G244100	TraesCS2B02G244100		TraesCS2B02G609500	TraesCS2B02G609500		TraesCS1B02G021100
TraesCS2B02G574500	TraesCS2B02G574500		TraesCS2B02G609600	TraesCS2B02G609600		TraesCS1B02G194600
TraesCS2B02G574600	TraesCS2B02G574600		TraesCS2D02G044100	TraesCS2D02G044100		TraesCS1D02G011800
TraesCS2B02G609500	TraesCS2B02G609500		TraesCS2D02G400000	TraesCS2D02G400000		TraesCS3D02G483000
TraesCS2B02G609600	TraesCS2B02G609600		TraesCS2D02G503200	TraesCS2D02G503200		TraesCS5B02G020900
TraesCS2D02G044100	TraesCS2D02G044100		TraesCS2D02G504900	TraesCS2D02G504900		TraesCS6B02G167500
TraesCS2D02G400000	TraesCS2D02G400000		TraesCS2D02G545400	TraesCS2D02G545400		TraesCS7A02G129500
TraesCS2D02G503200	TraesCS2D02G503200		TraesCS2D02G579500	TraesCS2D02G579500
TraesCS2D02G504900	TraesCS2D02G504900		TraesCS2D02G589400	TraesCS2D02G589400
TraesCS2D02G545400	TraesCS2D02G545400		TraesCS2D02G589500	TraesCS2D02G589500
TraesCS2D02G579500	TraesCS2D02G579500		TraesCS3A02G260800	TraesCS3A02G260800
TraesCS2D02G589400	TraesCS2D02G589400		TraesCS3A02G376700	TraesCS3A02G376700
TraesCS2D02G589500	TraesCS2D02G589500		TraesCS3A02G488200	TraesCS3A02G488200
TraesCS3A02G260800	TraesCS3A02G260800		TraesCS3A02G488300	TraesCS3A02G488300
TraesCS3A02G488200	TraesCS3A02G488200		TraesCS3B02G152200	TraesCS3B02G152200
TraesCS3A02G488300	TraesCS3A02G488300		TraesCS3B02G234100	TraesCS3B02G234100
TraesCS3B02G471900	TraesCS3B02G471900		TraesCS3B02G490600	TraesCS3B02G490600
TraesCS3B02G490600	TraesCS3B02G490600		TraesCS3B02G536100	TraesCS3B02G536100
TraesCS3B02G536100	TraesCS3B02G536100		TraesCS3B02G538500	TraesCS3B02G538500
TraesCS3B02G538500	TraesCS3B02G538500		TraesCS3B02G571200	TraesCS3B02G571200
TraesCS3B02G540700	TraesCS3B02G540700		TraesCS3D02G025800	TraesCS3D02G025800
TraesCS3B02G571200	TraesCS3B02G571200		TraesCS3D02G133100	TraesCS3D02G133100
TraesCS3D02G025800	TraesCS3D02G025800		TraesCS3D02G133200	TraesCS3D02G133200
TraesCS3D02G133100	TraesCS3D02G133100		TraesCS3D02G261100	TraesCS3D02G261100
TraesCS3D02G261100	TraesCS3D02G261100		TraesCS3D02G429600	TraesCS3D02G429600
TraesCS3D02G429600	TraesCS3D02G429600		TraesCS3D02G429900	TraesCS3D02G429900
TraesCS3D02G429900	TraesCS3D02G429900		TraesCS3D02G483000	TraesCS3D02G483000
TraesCS3D02G430200	TraesCS3D02G430200		TraesCS3D02G486100	TraesCS3D02G486100
TraesCS3D02G483000	TraesCS3D02G483000		TraesCS4A02G103700	TraesCS4A02G103700
TraesCS3D02G486100	TraesCS3D02G486100		TraesCS4A02G429800	TraesCS4A02G429800
TraesCS4A02G008400	TraesCS4A02G008400		TraesCS4A02G435300	TraesCS4A02G435300
TraesCS4A02G103700	TraesCS4A02G103700		TraesCS4A02G469800	TraesCS4A02G469800
TraesCS4A02G429800	TraesCS4A02G429800		TraesCS4B02G044400	TraesCS4B02G044400
TraesCS4A02G435300	TraesCS4A02G435300		TraesCS4B02G059300	TraesCS4B02G059300
TraesCS4A02G469800	TraesCS4A02G469800		TraesCS4B02G330800	TraesCS4B02G330800
TraesCS4B02G044400	TraesCS4B02G044400		TraesCS4B02G331000	TraesCS4B02G331000
TraesCS4B02G059300	TraesCS4B02G059300		TraesCS4D02G201100	TraesCS4D02G201100
TraesCS4B02G200100	TraesCS4B02G200100		TraesCS4D02G201200	TraesCS4D02G201200
TraesCS4B02G330800	TraesCS4B02G330800		TraesCS4D02G327700	TraesCS4D02G327700
TraesCS4B02G330900	TraesCS4B02G330900		TraesCS4D02G327900	TraesCS4D02G327900
TraesCS4B02G331000	TraesCS4B02G331000		TraesCS5A02G021700	TraesCS5A02G021700
TraesCS4D02G295400	TraesCS4D02G295400		TraesCS5A02G024000	TraesCS5A02G024000
TraesCS4D02G327700	TraesCS4D02G327700		TraesCS5A02G143500	TraesCS5A02G143500
TraesCS4D02G327900	TraesCS4D02G327900		TraesCS5A02G374800	TraesCS5A02G374800
TraesCS5A02G024000	TraesCS5A02G024000		TraesCS5A02G424000	TraesCS5A02G424000
TraesCS5A02G143500	TraesCS5A02G143500		TraesCS5A02G432600	TraesCS5A02G432600
TraesCS5A02G374800	TraesCS5A02G374800		TraesCS5A02G502300	TraesCS5A02G502300
TraesCS5A02G424000	TraesCS5A02G424000		TraesCS5A02G502400	TraesCS5A02G502400
TraesCS5A02G502300	TraesCS5A02G502300		TraesCS5B02G142500	TraesCS5B02G142500
TraesCS5A02G502400	TraesCS5A02G502400		TraesCS5B02G426300	TraesCS5B02G426300
TraesCS5B02G020900	TraesCS5B02G020900		TraesCS5B02G435000	TraesCS5B02G435000
TraesCS5B02G142500	TraesCS5B02G142500		TraesCS5D02G432600	TraesCS5D02G432600
TraesCS5B02G426300	TraesCS5B02G426300		TraesCS5D02G440700	TraesCS5D02G440700
TraesCS5B02G435000	TraesCS5B02G435000		TraesCS6B02G080000	TraesCS6B02G080000
TraesCS5D02G148500	TraesCS5D02G148500		TraesCS7A02G021900	TraesCS7A02G021900
TraesCS5D02G432600	TraesCS5D02G432600		TraesCS7A02G049400	TraesCS7A02G049400
TraesCS5D02G440700	TraesCS5D02G440700		TraesCS7A02G059900	TraesCS7A02G059900
TraesCS6B02G167400	TraesCS6B02G167400		TraesCS7A02G132000	TraesCS7A02G132000
TraesCS7A02G021900	TraesCS7A02G021900		TraesCS7A02G455000	TraesCS7A02G455000
TraesCS7A02G049400	TraesCS7A02G049400		TraesCS7A02G477900	TraesCS7A02G477900
TraesCS7A02G059900	TraesCS7A02G059900		TraesCS7B02G380300	TraesCS7B02G380300
TraesCS7A02G129500	TraesCS7A02G129500		TraesCS7B02G398800	TraesCS7B02G398800
TraesCS7A02G132000	TraesCS7A02G132000		TraesCS7D02G019400	TraesCS7D02G019400
TraesCS7A02G187300	TraesCS7A02G187300		TraesCS7D02G044500	TraesCS7D02G044500
TraesCS7A02G477900	TraesCS7A02G477900		TraesCS7D02G050800	TraesCS7D02G050800
TraesCS7B02G380300	TraesCS7B02G380300		TraesCS7D02G131600	TraesCS7D02G131600
TraesCS7D02G019400	TraesCS7D02G019400		TraesCS7D02G479100	TraesCS7D02G479100
TraesCS7D02G044500	TraesCS7D02G044500		TraesCSU02G122000	TraesCSU02G122000
TraesCSU02G184900	TraesCSU02G184900		TraesCSU02G184900	TraesCSU02G184900
TraesCS1A02G186200			TraesCS1A02G186200
TraesCS1A02G203900			TraesCS1A02G203900
TraesCS1B02G217700			TraesCS1B02G217700
TraesCS1B02G269100			TraesCS2D02G503200
TraesCS2D02G503200			TraesCS2D02G504900
TraesCS2D02G504900			TraesCS2D02G579500
TraesCS2D02G579500			TraesCS3B02G571200
TraesCS3B02G540700			TraesCS4A02G429800
TraesCS3B02G571200			TraesCS4B02G330800
TraesCS4A02G429800			TraesCS4B02G331000
TraesCS4B02G200100			TraesCS4D02G327700
TraesCS4B02G330800			TraesCS4D02G327900
TraesCS4B02G330900			TraesCS5A02G502300
TraesCS4B02G331000			TraesCS5A02G502400
TraesCS4D02G327700			TraesCS7A02G059900
TraesCS4D02G327900			TraesCS7A02G455000
TraesCS5A02G502300			TraesCS7A02G477900
TraesCS5A02G502400			TraesCS7B02G380300
TraesCS7A02G059900			TraesCS7D02G050800
TraesCS7A02G477900
TraesCS7B02G380300

## Sheet: Table S8
Table S8: FPKM value of all GST genes in common wheat.
geneID	CS0-1	CS0-2	CS0-3	CS100-1	CS100-2	CS100-3	CS200-1	CS200-2	CS200-3	CS300-1	CS300-2	CS300-3
TraesCS7A02G190700	1.33555	1.42132	0.874028	1.2694	1.52734	1.48384	1.92377	1.48663	1.65327	1.3266	1.31116	1.39532
TraesCS7D02G191700	1.67127	1.36228	1.22229	1.1441	1.37326	1.9537	1.3896	1.66319	1.28829	0.910678	1.24875	1.2232
TraesCS7B02G095600	1.31872	1.71962	1.58212	1.43363	1.63275	1.37568	1.22514	1.55095	1.06273	1.90501	2.3819	1.42581
TraesCS1B02G059100	29.3414	28.3407	28.7785	44.4647	46.3491	46.8311	80.8396	75.7659	82.7481	47.211	46.5775	48.4922
TraesCS1A02G045700	18.3689	17.9991	17.009	29.6305	30.2202	29.5647	47.1435	45.5541	50.8265	38.3981	39.3762	38.3575
TraesCS2B02G147700	95.8109	92.022	86.8759	101.241	98.5382	100.6	175.337	170.278	176.796	83.1415	88.2288	93.3853
TraesCS2D02G128300	136.845	125.304	125.472	129.863	128.618	130.859	202.64	199.469	215.399	105.209	102.897	102.479
TraesCS2A02G125200	100.149	95.3299	96.319	103.534	101.787	101.095	161.398	143.953	167.953	83.0943	81.1009	81.6358
TraesCS2D02G177300	91.1322	85.7685	86.3925	94.4134	97.374	94.726	154.488	153.249	156.654	80.5537	81.0198	83.5549
TraesCS2A02G169800	103.7	105.456	102.379	105.972	102.426	102.356	140.892	135.471	150.545	94.3581	90.5915	89.5518
TraesCS2B02G196100	106.858	100.089	96.7847	97.8717	98.8042	95.7494	144.952	150.179	154.192	80.3244	75.2226	86.37
TraesCS4A02G103900	1.93795	1.22434	1.58891	2.6798	2.41513	3.07196	21.9841	20.7891	21.08	9.83215	10.0538	9.32619
TraesCS4D02G201100	1.83342	1.58821	1.37362	3.37259	3.86297	2.96838	27.9796	26.1465	31.5864	28.2565	26.5556	26.1944
TraesCS4B02G200000	0.445926	0.580469	0.615813	1.28098	1.08773	0.99171	6.01487	5.73332	6.91043	2.7257	2.08411	2.32408
TraesCS4D02G201200	0.0145901	0.158375	0.130435	0.0284031	0.0136369	0.0633496	1.5455	0.966311	0.728224	0.743018	0.834217	0.830028
TraesCS4B02G200100	0	0	0.0141718	0.0555482	0.0133349	0.09292	0.353285	0.559233	0.55813	0.0573602	0.110235	0.0791849
TraesCS4A02G103800	0.478957	0.395028	0.559722	1.46717	1.05334	1.29976	2.98442	3.57963	3.89563	1.15161	1.11022	1.32916
TraesCS7A02G455000	0.819901	1.24116	0.764572	1.12381	1.54832	1.50754	0.828685	0.588033	0.722306	0.403642	0.362004	0.0696527
TraesCSU02G231100	2.65319	9.37156	2.79686	1.93251	2.74978	2.40981	1.76291	1.24418	0.779125	2.83006	0.836744	1.60281
TraesCS7D02G444000	0	0	0.0238022	0	0.0223966	0	0	0	0	0	0	0
TraesCS4D02G201300	0	0	0	0.128626	0.0154391	0.0179303	0.0227239	0.290247	0.0222827	0.354193	0.12763	0.320879
TraesCS4A02G103700	0	0	0	0.0296156	0.0284382	0	0	0.0822499	0	0.713573	0.611231	0.569937
TraesCS4B02G199700	0.863866	0.926149	0.635635	1.61944	1.74944	1.89281	4.0274	3.95701	3.56076	3.77332	3.31266	3.59599
TraesCS4A02G104300	1.54379	1.54478	1.45207	3.55057	3.34557	4.01888	7.36744	5.59519	6.83736	4.08293	3.77904	4.49271
TraesCS4D02G200700	0.242745	0.123515	0.331549	0.428259	0.411233	0.494058	0.1461	0.943303	1.1461	1.28094	1.07847	1.24203
TraesCS4B02G044500	13.6646	11.8853	12.0981	15.5916	18.7734	16.197	23.5136	23.9365	23.4577	39.8411	36.6533	37.6355
TraesCS4D02G042000	27.1032	26.232	27.295	32.6473	34.1338	35.7974	48.1475	53.0502	52.8613	41.6553	49.835	49.6034
TraesCS4A02G269600	13.9745	14.699	15.1726	25.6718	27.9691	25.7253	48.5946	57.4429	56.3854	49.3163	50.5303	51.4766
TraesCS4D02G041800	16.649	17.3157	16.6211	18.2253	19.0021	18.7807	24.8375	23.6344	23.7232	20.0475	22.1857	21.5691
TraesCS4A02G269800	27.2158	26.7959	26.3284	39.1784	37.5755	37.3971	46.7062	52.0682	50.266	79.9822	78.149	82.6762
TraesCS4D02G041900	3.63837	4.36231	5.34632	5.8885	5.51353	6.54342	3.87983	4.5104	2.7009	10.8484	10.7459	9.94753
TraesCS4B02G044300	40.2325	41.8335	46.0851	53.0324	45.3031	50.6825	70.2622	73.4989	72.3828	117.315	119.698	123.667
TraesCS4B02G044400	4.43592	4.58918	5.41929	5.6578	5.83794	6.69694	7.50532	7.33967	6.36226	30.0318	31.123	32.7564
TraesCS4A02G269700	23.9813	24.1335	24.5286	23.9627	24.586	20.0117	29.8464	29.1221	33.1085	55.6906	60.6838	60.4156
TraesCS6B02G424900	0.89222	0.990516	1.00713	1.13163	1.59206	1.58481	1.80394	0.931883	1.00299	1.86605	1.50411	1.01292
TraesCS6A02G385800	0	0	0	0	0	0	0	0	0	0	0	0
TraesCS6D02G370500	0	0	0	0	0	0	0	0	0	0	0	0
TraesCS6A02G059600	70.2117	69.7673	67.4953	35.1955	33.7222	34.3112	41.2888	38.5327	39.8001	68.0841	68.2234	70.3033
TraesCS6B02G080000	26.3673	27.9546	28.842	15.3353	14.3969	15.7589	26.913	28.4589	25.785	67.0971	70.5839	69.655
TraesCSU02G122000	37.365	36.0719	38.7486	15.7175	14.5192	14.6506	21.6089	22.5141	22.1418	72.3205	71.586	69.0477
TraesCS4D02G327800	4.2837	4.38447	4.37293	7.54573	7.28729	6.16235	6.99418	6.07053	7.71816	1.84741	2.19893	1.72763
TraesCS4B02G330900	5.04062	5.43157	6.19991	11.2586	10.8996	12.3153	15.3034	18.4104	15.0702	3.36705	3.27204	3.17916
TraesCS5A02G502300	4.22754	3.62059	4.45483	8.19863	6.98625	6.15932	7.89444	8.0389	9.21566	1.29253	1.76364	1.91814
TraesCS4D02G327900	0.3652	0.495531	0.395744	1.37343	0.822325	1.11719	1.02764	1.09943	0.716579	0.0444935	0.153914	0.161234
TraesCS4B02G331000	0	0.0407291	0.111813	0.109566	0.189378	0.171061	0.154852	0.0608583	0.212584	0	0.0347894	0
TraesCS5A02G502400	0.116315	0.210434	0.23108	1.0567	1.32272	0.820686	1.01342	0.786086	0.732233	0.0259803	0.23966	0.0806971
TraesCS4D02G327700	3.46708	3.77676	3.1893	3.92137	3.32046	3.63097	2.56956	3.5642	2.81609	0.785317	0.77348	0.491241
TraesCS4B02G330800	0.962361	1.08572	1.05261	2.25237	2.50645	2.44139	2.52882	2.13385	2.52348	0.376773	0.451161	0.705175
TraesCS1A02G203900	1.80085	2.30447	1.99246	6.89759	7.10232	6.22997	5.76051	4.47244	6.45843	1.13805	0.972885	1.17829
TraesCS1D02G207400	1.65589	1.77626	1.9942	6.60408	6.06759	6.1718	6.67272	6.59569	5.89081	1.88531	1.76631	1.95198
TraesCS1B02G217700	0.952855	1.49492	1.13876	4.84029	4.42521	4.99381	4.97708	5.87615	5.36246	0.618539	0.483155	0.619754
TraesCS4D02G328000	13.4209	13.5215	13.3769	15.7684	15.7836	14.386	17.7909	15.313	16.9923	10.9677	10.8063	12.1183
TraesCS4B02G331100	2.67775	2.30845	2.62419	5.77266	4.28335	4.17469	6.52693	5.82986	6.40019	4.60019	4.24908	3.41629
TraesCS5A02G502500	1.63703	1.43407	1.64323	3.08624	4.02655	3.51656	5.45233	6.07906	6.04383	1.89367	2.07705	1.76936
TraesCS3D02G445400	292.175	327.796	326.065	310.989	304.056	300.476	358.97	336.383	346.544	755.196	736.443	785.414
TraesCS3A02G452900	33.7093	39.647	42.3696	36.2942	35.0152	34.6112	46.9285	50.8021	44.3375	47.8555	39.0282	48.0634
TraesCS3B02G490600	63.3602	68.8151	72.0911	85.1081	85.788	86.8832	127.22	130.826	128.628	581.161	572.269	625.698
TraesCS3A02G452800	4.13332	3.31128	4.4412	6.08747	6.91859	7.22855	10.3318	11.7943	10.2769	10.952	10.4368	9.2026
TraesCS3B02G490400	6.29609	6.8671	6.20923	15.2038	16.5562	14.4372	17.7581	18.0992	18.0026	22.8507	22.1125	21.4016
TraesCS3D02G445300	4.99746	4.91145	5.25026	9.72876	11.9265	11.7874	18.3068	20.0503	20.1856	18.6254	21.2986	17.9452
TraesCS3D02G299900	273.957	272.818	278.419	508.604	489.572	496.042	542.405	539.801	549.769	554.112	559.346	571.227
TraesCS3B02G334500	425.294	431.782	428.479	795.452	765.437	772.426	885.448	909.414	884.522	959.546	962.813	1009.55
TraesCS3A02G302100	234.044	232.517	238.158	428.955	412.277	413.427	537.948	544.653	567.34	593.995	630.141	622.513
TraesCS3A02G302300	0.0254938	0.0461225	0.0253238	0	0.0238283	0	0.0350716	0	0	0.136663	0.0393962	0.17687
TraesCS3D02G299700	20.5867	18.5599	21.4282	18.2383	16.6246	18.1251	23.4938	20.63	26.1156	34.4928	37.3157	34.6573
TraesCS3B02G334300	6.63324	5.66401	5.65605	5.08529	5.55979	7.05164	7.72554	8.54262	7.31158	10.7777	10.946	11.4846
TraesCS7D02G479100	19.5075	20.6037	20.6838	17.1746	17.9941	16.0202	45.3051	48.6856	46.4459	82.787	82.5612	87.1086
TraesCS7B02G398800	27.4698	26.2031	30.5191	22.133	23.6787	23.2089	32.9015	31.1391	32.8013	101.827	101.343	105.484
TraesCS1A02G102900	1.44813	0.899604	0.935873	1.08689	1.17414	0.719678	1.77616	1.36779	1.83581	7.10821	6.09336	6.85119
TraesCS1B02G113800	9.63576	10.1642	8.97731	8.18317	8.37161	7.87975	9.02999	8.19472	7.8078	16.7919	17.7385	16.2641
TraesCS1D02G095000	1.38529	1.08223	2.10578	2.43121	2.09913	2.71125	1.73248	4.17039	2.66152	17.6932	17.0285	17.5616
TraesCS1A02G103000	17.7238	16.2005	17.7592	17.5529	19.0811	15.7639	23.7867	27.8026	25.8284	47.3812	47.847	48.2412
TraesCS1B02G114300	30.8671	29.2123	29.6352	18.8411	20.2299	19.2493	28.7603	28.59	26.3106	70.6701	65.4493	64.2278
TraesCS1D02G095100	24.3154	24.2712	25.2779	15.1663	14.8489	14.2603	16.169	20.1373	16.5581	44.629	42.1298	43.963
TraesCS1A02G102700	14.5571	12.3907	13.5541	33.9042	34.507	31.3367	61.4776	61.5409	62.7918	109.532	114.374	116.885
TraesCS1B02G113500	10.3225	10.4824	10.8905	18.8473	15.8396	18.1635	28.2429	24.55	26.4306	73.5309	74.7288	75.1049
TraesCS1D02G094700	39.3247	38.3957	36.6857	61.5343	61.0002	61.2821	113.755	117.79	113.581	175.3	173.788	182.077
TraesCS1B02G113600	0.120644	0.309209	0.0399466	0.665444	1.16521	0.916707	0.802184	0.842518	0.24412	0.269472	0.310724	0.390601
TraesCS1D02G094800	0.0200832	0.0545008	0.119696	0.234581	0.225255	0.654005	0.635452	0.95009	1.02949	0.242234	0.682772	0.780266
TraesCS7B02G084400	6.33438	5.26663	5.17279	7.3789	7.34087	8.21033	6.08347	6.9464	7.41638	10.0908	10.5274	10.9689
TraesCS1B02G114400	2.33477	1.85488	2.0772	3.61639	3.75725	3.45997	3.26778	4.74739	3.80685	16.1346	16.0319	16.0854
TraesCS1D02G095400	273.549	275.159	288.269	268.868	263.462	263.415	249.6	251.018	255.886	428.462	441.501	472.946
TraesCS1A02G102800	54.6567	55.9525	59.1309	80.8547	78.4159	72.6959	80.226	78.5478	80.0265	115.171	116.527	117.053
TraesCS1D02G094900	21.9082	23.9591	25.6665	45.3234	46.1724	44.2655	44.9166	41.8374	39.7665	80.001	75.3721	91.5377
TraesCS1B02G113700	104.865	103.777	112.763	118.36	116.012	114.618	82.7336	90.2674	78.7698	76.2446	74.9239	85.6203
TraesCS4A02G349700	19.6682	16.8979	17.4629	18.9915	19.9153	19.4731	20.8799	19.908	22.6552	74.1713	73.6598	70.8439
TraesCS5B02G020900	7.30103	6.08639	6.70724	7.36207	7.09168	6.39714	0.722115	0.902991	0.997768	7.03466	6.71048	6.19092
TraesCS5B02G021100	0	0.0211314	0.139228	0	0	0.0253575	0	0	0	0	0	0
TraesCS5A02G024000	0.196359	0.337483	0.15604	0.458712	0.367062	0.490236	0.0810388	0.796223	0.84763	5.3157	3.88401	4.35935
TraesCS5B02G021800	7.50199	6.25481	7.13522	7.07351	10.4786	6.84989	8.6119	10.7072	8.89748	17.4987	10.4	14.0656
TraesCS5B02G020700	49.3021	43.5051	48.8534	67.9961	64.9164	69.1634	73.6681	70.7205	73.5955	155.105	157.633	160.842
TraesCS5A02G024100	33.871	32.9814	34.1757	62.2994	60.1553	58.4789	61.1783	63.3244	62.7192	100.654	97.5812	98.4421
TraesCS5D02G030000	164.7	159.195	163.712	202.448	198.486	189.765	208.03	202.324	203.628	237.608	234.974	241.235
TraesCS7D02G514500	19.9332	18.5164	19.6112	13.4907	14.5555	14.4437	13.7586	13.0036	13.9116	29.3109	30.6161	34.0449
TraesCS7B02G443300	0.0256107	0.046334	0.0508799	0	0.0239376	0	0	0.173083	0	0	0.0791538	0.106609
TraesCS7A02G525700	21.0655	21.8851	23.3046	19.0206	17.2836	18.5897	20.046	15.6013	17.3866	20.2978	20.1314	21.7299
TraesCS7A02G525600	0	0	0	0	0	0	0	0	0.0348683	0	0	0
TraesCS1D02G011800	9.36926	7.70173	7.75566	7.00268	6.27251	5.65014	1.20197	0.879439	1.07832	13.528	11.1749	11.5043
TraesCS1A02G013900	6.49662	4.71526	5.74897	5.31632	5.67815	5.22142	2.05638	1.19154	2.17157	17.5415	15.5477	14.1997
TraesCS5D02G440700	2.56349	2.7199	2.24006	0.900532	0.738623	0.732275	3.44703	2.94389	3.01608	23.3252	21.4453	19.657
TraesCS5A02G432600	0.626491	0.700057	0.750437	1.38104	1.58447	1.52011	7.52859	7.24756	6.31357	24.6941	21.5836	25.3629
TraesCS5B02G435000	9.74164	9.85964	10.2815	8.70366	8.80396	9.07124	10.9216	9.31066	9.92038	79.2444	77.244	83.0903
TraesCS3B02G152200	1.59194	1.04619	1.68945	0.913837	0.775766	1.44742	1.68463	2.00462	2.5513	4.95985	6.51813	6.09811
TraesCS3D02G133100	1.7631	1.85319	2.35568	0.519678	0.893589	0.256075	1.2469	1.09085	1.23944	11.7476	10.3418	11.5945
TraesCS4B02G059100	18.6799	19.9406	20.2896	6.94966	6.59376	7.1955	6.73687	8.53769	7.08476	18.1288	19.3247	18.9865
TraesCS4B02G059300	7.67283	8.08065	9.28544	2.8725	2.81794	2.28566	3.53311	2.86764	3.74425	18.5348	19.3015	18.4598
TraesCS3A02G309100	53.6039	54.5861	55.3638	6.6307	6.60938	5.9875	6.16171	6.13188	5.30381	21.7135	21.3431	21.5821
TraesCS3B02G152300	0.420912	0.315103	0.273932	0.0847663	0.298453	0.110285	0.319474	0.294271	0.293691	0.194515	0.336438	0.322229
TraesCS3D02G133200	0.446856	0.613297	0.673469	1.19988	1.09457	1.32137	2.84051	2.291	2.95164	5.3278	5.11951	5.94382
TraesCS3A02G309000	35.6723	35.8564	35.8492	9.27524	10.697	9.66384	7.7201	7.2698	9.04448	19.4189	20.4182	18.044
TraesCS5D02G418100	0.22283	0.0167974	0.221345	2.11474	1.94388	1.61254	2.60564	2.08321	3.18128	1.61758	1.43477	2.1128
TraesCS2B02G420800	0	0	0	0	0	0	0	0	0	0	0.118731	0
TraesCS2D02G400000	0.0231345	0.0418542	0	0.0675555	0.129739	0	0.254608	0	0.124832	1.14715	1.00101	1.02722
TraesCS5D02G268900	0	0	0	0.0245903	0	0.0274228	0	0	0	0	0	0.210324
TraesCS5B02G259700	0	0	0	0	0	0	0	0	0.0242953	0	0	0
TraesCS7B02G096300	1.21138	1.66561	1.44397	5.56548	6.64252	5.45265	8.24358	9.27839	9.87017	3.3335	3.9686	4.19096
TraesCS7D02G192500	0.93552	0.895078	0.965025	0.647933	0.790327	1.07409	1.01474	1.79947	0.849422	0.723318	0.305817	0.299559
TraesCS2D02G044100	1.68048	2.30526	1.33909	2.37271	2.5718	2.68611	1.01619	0.349449	1.968	57.9612	62.2397	63.2651
TraesCS2A02G045400	0.659825	1.31617	1.14279	2.96425	2.48269	3.45262	1.21029	1.82944	1.32373	52.3536	55.8974	56.3178
TraesCS2D02G579500	0.35965	0.542222	0.442312	0.833507	1.12052	0.929517	1.06022	1.31947	0.854807	0.11476	0.344052	0.261399
TraesCS2D02G503200	0.40733	0.0589542	0.307507	0.872263	0.989872	1.06117	0.627604	0.616634	0.901148	0.0436712	0.100713	0.0678233
TraesCS6D02G016700	0	0	0	0	0	0	0	0.0242391	0	0	0	0
TraesCS1A02G078900	0	0.0153508	0.117998	0.214736	0.237921	0.128946	0.0700366	0.114687	0	0	0.0262242	0.117734
TraesCS1D02G081200	13.8583	12.8203	14.3902	82.2205	79.26	77.1258	136.545	133.754	137.751	90.9882	90.98	99.1984
TraesCS1B02G097400	2.21926	1.68196	1.96614	9.4726	9.81078	9.50574	16.2346	11.9986	14.4023	15.9761	15.7571	18.3097
TraesCS1B02G097200	2.57274	2.03835	2.53796	7.61631	7.29692	8.57066	12.2777	11.2717	12.7573	7.15735	5.73051	5.93329
TraesCS1A02G078800	9.14582	8.98692	9.33424	33.7763	31.3942	30.2503	38.683	35.7284	39.6736	77.7954	80.6428	83.9306
TraesCS1D02G190100	7.7123	7.76821	8.29537	19.1358	18.9278	18.7463	23.5302	21.8718	24.9881	61.9511	65.2931	63.2228
TraesCS1A02G186500	44.7523	41.5537	40.6503	55.1714	48.3046	50.8659	80.8745	86.7404	87.3684	124.344	127.416	128.149
TraesCS1B02G194300	8.35088	8.59934	8.41354	11.9898	11.5688	10.3321	22.5832	24.0562	22.3857	28.5457	32.124	33.7537
TraesCS7A02G129500	0.385931	0.651666	0.408915	0.350611	0.553103	0.530638	0	0.208657	0.0347076	0.965461	1.19278	0.785403
TraesCS7B02G029300	0.144748	0.149642	0.431349	0.0402553	0.251256	0.202015	0.227576	0.391296	0.195262	0.415685	0.287592	0.286923
TraesCS7A02G059900	0.636725	0.815958	0.527067	1.42891	1.48782	1.88149	1.58155	0.573751	1.62242	0.260736	0.136659	0.147249
TraesCS4A02G429900	0	0	0	0	0	0	0	0	0	0	0	0
TraesCS7D02G054400	0	0	0	0	0	0	0	0	0	0	0	0
TraesCS4A02G429800	3.54439	2.83475	3.43489	1.38842	1.79782	1.45451	0.594633	0.29212	0.349852	0.0289638	0.100193	0
TraesCS3B02G025000	38.0302	41.9331	38.9503	25.9637	24.009	29.6937	24.5144	26.3593	22.2759	55.8846	57.5017	59.2881
TraesCS3D02G025800	26.8863	28.5869	27.5073	33.0642	30.479	32.373	27.3364	27.2443	26.1717	127.035	132.399	129.454
TraesCS3A02G021200	1.2407	1.15109	1.29563	1.64118	1.54619	0.984176	2.31952	1.93498	1.90971	4.90295	5.40771	6.06953
TraesCS7B02G032700	0	0.0213097	0	0	0	0	0.0324079	0	0	0	0	0.326874
TraesCS7A02G132000	1.83963	2.17125	2.05361	1.8077	1.6212	1.84476	1.78359	0.449944	1.67805	20.8738	21.5513	23.4839
TraesCS7D02G131600	5.00867	4.53075	5.36759	3.68705	3.28877	3.44919	4.34662	6.52729	5.352	19.4396	22.1104	19.579
TraesCS1B02G194400	2.59133	1.57692	2.38685	3.34781	3.23673	2.55715	3.2732	3.05678	2.70119	4.83036	3.67681	4.90312
TraesCS1D02G190000	29.7195	27.7073	30.3404	32.0048	31.0053	33.0061	45.5878	47.0433	49.546	71.2317	74.1456	69.913
TraesCS2B02G523700	0.0187984	0	0	0	0	0	0	0	0	0	0	0
TraesCS6B02G429400	0	0	0	0	0	0	0	0	0	0	0	0
TraesCS1B02G021400	0	0	0	0	0	0	0	0	0	0	0.036404	0
TraesCS1A02G016800	39.482	36.8155	35.8442	26.5855	22.764	27.1528	13.23	14.3923	12.9959	74.6798	71.4859	73.0525
TraesCS1D02G017200	0	0	0	0.0253947	0	0	0	0	0	0	0	0
TraesCS1D02G014500	1.76789	1.05515	1.59317	0.49673	1.00507	0.850705	0.275802	0.270982	0.0983444	8.1581	10.1111	9.357
TraesCS1B02G021100	1.76499	1.90612	1.4312	1.92836	1.75069	1.29029	0.396422	0.29212	0.41302	6.10654	5.73329	5.49782
TraesCS1D02G017000	0	0	0	0	0	0	0	0	0	0.224791	0.444348	0
TraesCS1A02G017300	8.73413	7.26674	9.28286	9.63859	10.784	10.4562	2.0273	3.15784	2.44856	35.236	34.8813	37.679
TraesCS1A02G017400	0.0777235	0.123038	0.0965066	0.113481	0.345068	0.0843682	0.0267309	0	0.0786356	1.71868	1.17105	1.13238
TraesCSU02G183000	0	0	0	0	0	0	0	0	0	0	0	0.0730842
TraesCSU02G184900	0.017557	0.0317636	0.0523199	0.034179	0.0328201	0	0	0.0474618	0.0473682	0.423528	0.434101	0.487228
TraesCS4D02G295400	4.44835	3.77754	4.2684	4.47717	3.71935	4.20454	1.47785	1.55428	1.69409	8.98285	8.48747	9.59443
TraesCS4B02G296500	7.52663	6.60069	7.26585	7.49818	7.72852	7.38378	4.61813	4.82398	4.71913	14.5621	15.1532	16.499
TraesCS4A02G008400	3.1798	3.91323	3.06678	3.65297	4.83825	5.07713	1.85659	2.42385	1.04743	9.73693	9.79908	12.0308
TraesCS1B02G194600	3.44698	5.09433	4.05093	4.48934	4.35623	4.74296	0.46752	0.196863	1.24434	10.215	9.82814	11.0478
TraesCS1B02G194500	2.14196	2.3505	2.38928	1.91402	2.05126	2.07732	2.53607	1.68489	2.01315	0.776468	1.08525	0.755203
TraesCS1D02G189900	5.06606	6.02141	4.99327	4.39599	5.50593	4.54001	5.07843	4.19344	4.23815	11.2103	9.19418	11.9065
TraesCS1A02G186600	11.4492	11.0148	10.8395	10.1327	11.3974	11.7699	1.83478	1.61542	1.82252	46.5189	45.9047	54.0522
TraesCS6B02G167300	7.10066	6.74583	6.88458	11.3429	11.7811	11.4878	7.94553	7.16375	9.07452	30.1873	27.1696	32.127
TraesCS6B02G167600	1.91787	2.24707	1.85065	7.52054	5.68504	6.91962	3.56812	1.33317	3.62204	7.39257	6.63312	18.8055
TraesCS6B02G167500	0.314203	0.787077	0.456157	1.64681	2.19128	2.17756	0.897742	0.130674	0.130416	0.615429	0.522895	0.402438
TraesCS6B02G167400	10.7426	11.5438	10.5719	15.3329	15.3291	14.123	5.86338	9.73624	6.92633	40.2843	39.9804	39.6684
TraesCS6A02G139000	4.96553	4.22357	5.02445	2.30844	1.81836	2.53413	1.78423	2.15374	1.39967	2.73138	3.14951	3.7792
TraesCS6D02G127700	7.72114	7.20439	7.60928	11.1106	10.2	11.6644	12.0647	12.4495	13.3476	40.9016	42.0192	43.5079
TraesCS6D02G127800	1.38343	0.864082	0.752543	7.51848	7.52743	7.90183	12.1667	8.99338	12.1749	9.62329	10.7656	10.2378
TraesCS6A02G139100	0.525836	0.825413	0.798857	2.99573	2.05267	3.30723	1.06381	2.23675	2.06544	4.22824	5.40131	7.1246
TraesCS5D02G027300	4.04541	4.45121	4.39443	4.65153	4.75405	5.00758	4.75161	6.9069	4.46786	13.4428	14.6233	14.6075
TraesCS5D02G027500	2.82067	2.41788	3.53569	8.48508	7.93432	7.96072	8.35205	7.47986	8.22611	11.9705	10.9179	11.3688
TraesCS5B02G018400	3.51253	3.55303	4.15944	3.28426	3.81677	3.92552	5.26063	6.89937	6.48895	5.56537	5.0804	5.11393
TraesCS5A02G021700	0.634967	1.13324	1.14214	1.46998	1.84462	1.65793	5.54803	6.63405	4.58375	8.57861	9.33495	9.9059
TraesCS2B02G574500	0.128446	0.104571	0.038277	0.125026	0.0840387	0.0418283	0.282724	0.086807	0.12129	2.61652	2.14371	3.10115
TraesCS2D02G545400	0.444212	0.496374	0.558052	1.50062	1.45317	1.13456	1.40193	1.18318	1.0046	12.099	11.488	12.4543
TraesCS2A02G544400	0.0212287	0.0192031	0	0.0206634	0	0	0	0	0	0.0284499	0.0984155	0.176736
TraesCS2B02G574600	0.408938	0.539464	0.270808	0.597072	0.812223	0.499386	0.539132	0.0460616	0.413737	3.72213	3.89697	3.80647
TraesCS1B02G194700	28.1383	27.8855	26.3749	78.3635	73.4999	76.2239	58.6504	65.4124	59.0884	122.731	119.662	117.571
TraesCS1D02G189800	129.175	125.052	127.833	249.521	254.042	246.081	189.363	196.941	182.152	280.189	292.743	296.083
TraesCS1A02G186700	196.426	202.587	198.438	339.276	336.701	315.704	194.343	206.046	189.799	310.28	315.564	328.313
TraesCS1B02G194800	0.0223325	0.0404033	0	0	0.0834944	0	0	0	0	0.0897879	0	0
TraesCS1A02G186800	2.90055	2.04746	2.43154	2.95387	3.14985	3.9129	3.71348	3.37663	4.38775	20.7842	18.4214	17.0525
TraesCS1D02G189700	0.644828	0.743708	0.832688	0.815954	0.391757	0.997437	0.443543	0.414	0.282705	5.31468	5.75461	5.63684
TraesCS4A02G435300	0.811645	0.645206	0.757371	0.861853	1.19541	0.907733	1.18425	1.19679	1.49304	10.4818	9.19788	8.63424
TraesCS7A02G049400	9.92495	9.16085	9.32316	4.72372	2.77195	3.84113	3.50035	3.6897	3.18234	40.9872	41.4028	44.7046
TraesCS7D02G044500	14.8116	14.572	14.83	11.9897	10.4106	10.1333	15.0214	13.6883	15.207	60.792	66.5049	65.0929
TraesCS3A02G129800	1.60044	1.92198	1.93239	2.64561	2.16645	2.63585	2.27763	3.86024	2.49397	2.18183	2.6864	2.35471
TraesCS3D02G130700	10.3359	9.7572	9.56933	10.9119	12.4102	13.0894	8.09388	6.89567	6.84631	3.71156	3.50161	3.05219
TraesCS2A02G218700	12.5141	9.33353	9.626	6.5485	6.40218	6.31901	7.07326	5.08854	6.34813	9.85705	9.21132	10.7619
TraesCS2D02G224700	15.5626	16.0434	18.0989	10.7388	11.3586	8.89108	9.77332	11.0485	11.613	21.9317	20.1228	17.8365
TraesCS2B02G244100	2.81966	2.21793	2.49642	1.46179	1.40367	1.38065	3.05681	2.02987	2.93544	18.4217	17.9975	20.3064
TraesCS1D02G191100	11.1424	12.2159	11.8976	17.3485	12.4885	13.8303	31.97	35.4101	30.2549	64.1753	60.21	63.1341
TraesCS1A02G186100	3.22946	3.8497	3.37105	10.749	11.8565	11.705	15.9449	17.9598	19.4565	34.8442	34.7859	33.0763
TraesCS1B02G194000	0.191578	0.383732	0.190301	0.612709	0.588349	0.534746	0.865959	1.05428	0.57225	0.696883	0.740126	1.23419
TraesCS1D02G190600	4.82465	4.44168	5.33631	10.5581	9.16285	11.44	12.027	11.1925	9.43943	4.33348	4.8118	3.96446
TraesCS1A02G186200	0.294819	0.25002	0.21964	2.88762	2.89337	3.78028	5.72882	4.70718	6.13957	0.888989	0.313219	0.434646
TraesCS3D02G261100	1.71038	1.81201	2.23469	1.96481	1.67066	1.94024	2.16218	1.79115	1.72526	9.62308	8.81032	8.25293
TraesCS3B02G234100	21.0944	19.2357	19.8197	12.6878	11.8011	12.9285	18.0726	16.7895	20.5259	49.7578	50.292	51.4702
TraesCS3A02G260800	1.28559	1.84406	1.67837	1.60889	1.11578	1.23601	3.76454	4.86546	4.80631	21.0194	26.7347	23.5975
TraesCS2A02G504300	0	0.146342	0.0642797	0.073486	0.0100806	0.0234145	0	0.0874666	0.0581961	0	0.0166666	0
TraesCS2B02G532600	2.71439	1.97876	2.68044	3.77667	4.20855	4.69699	4.83246	2.58981	4.43708	2.48222	2.76351	3.23466
TraesCS2D02G504900	0	0	0.0151115	0.547889	0.184848	0.148621	0.104641	0.411249	0.10261	0	0.0235089	0.0211088
TraesCS2A02G144300	0.36783	0.166366	0.195738	0.268526	0.221015	0.0855593	0.451805	0.266344	0.159491	1.39083	0.933828	0.856719
TraesCS1D02G190200	0	0.0303936	0	0.506926	0.141321	0.346485	0.254225	0.317904	0.203964	1.80116	0.960563	1.25878
TraesCS1A02G186400	0.294136	0.384324	0.243479	0.906627	0.687302	0.372496	0.13488	0	0.198392	1.35777	1.66663	2.15402
TraesCS1B02G194200	0	0	0	0	0	0	0	0	0	0	0	0
TraesCS1D02G190500	0.870551	0.645738	0.639913	2.81327	2.42477	2.40024	2.58684	2.18862	1.97292	2.10003	2.3408	1.69112
TraesCS1B02G194100	5.91717	5.61157	5.26151	3.48363	3.19646	3.31512	4.63904	5.20295	4.76354	7.33311	8.92273	9.02704
TraesCS1D02G190300	1.31702	0.981115	1.5545	1.25179	1.53511	1.85009	1.21498	1.65449	1.60942	4.153	2.63382	3.99888
TraesCS1A02G186300	2.33002	2.72964	2.39037	1.89618	2.37417	1.74143	2.83756	2.8654	2.24143	5.01666	5.60755	6.33358
TraesCS4D02G225800	1.44126	1.09489	1.3552	4.80793	4.94375	4.15422	4.92795	5.42813	4.92665	7.03226	6.41136	6.42665
TraesCS4B02G225200	0.614883	0.222485	0.500842	1.53218	1.33334	1.52179	1.13349	0.930837	1.17784	1.36791	1.21625	0.614294
TraesCS7D02G465400	77.1754	75.558	76.3261	66.1485	63.0933	64.2932	47.2663	48.8771	47.4396	18.4725	14.9727	16.1797
TraesCS7B02G380300	8.28876	7.97297	7.67385	9.72255	8.98791	9.29799	13.1894	11.6681	11.5292	2.31636	1.9774	2.62353
TraesCS7A02G477900	14.5758	14.5498	16.1551	19.701	18.3082	19.6941	35.0556	36.0673	34.3921	2.17616	2.01534	1.41928
TraesCS7B02G058000	0	0	0	0	0	0	0	0	0	0	0	0
TraesCS7B02G057500	0.0218947	0	0	0	0.0204643	0	0	0	0	0	0.0338344	0
TraesCS7A02G531100	0	0	0	0	0	0	0	0	0	0	0	0
TraesCS3D02G430200	1.27947	1.24507	1.40574	0.849135	0.779137	1.19946	0.720064	0.235826	0.810687	1.9745	3.98435	3.30858
TraesCS3A02G437900	0	0	0	0.0180347	0	0	0	0	0	0	0	0
TraesCS3B02G471900	0.431241	0.468112	0.73679	0.335806	0.725525	0.617904	0.261032	0.536255	0.0930778	1.24834	2.71894	1.89086
TraesCS3D02G429900	0.0162143	0.161339	0	0.268304	0.166706	0.0352011	0.178448	0.131496	0.109364	1.36898	0.902031	0.764943
TraesCS3A02G437600	0	0.0167417	0	0	0.0345971	0	0.0254608	0.0250158	0.174765	0	0	0
TraesCS3A02G437500	0	0.171929	0.0943985	0.0231254	0	0.154735	0	0	0	0	0	0
TraesCS3D02G429800	0.121373	0.250952	0.378913	0.894492	0.794105	1.05399	0.882562	0.914008	1.02915	1.13861	1.07177	1.58788
TraesCS3B02G471600	0.0475161	0.300875	0.188797	0.60126	0.399707	0.541572	0.588307	0.931261	0.608933	0.573114	0.991274	1.78014
TraesCS3D02G429600	0.284118	0.514016	0.483812	1.01402	0.885189	0.734303	0.130286	0.987497	0.219011	4.58731	5.66589	7.24632
TraesCS3B02G471500	0.884412	0.406166	0.675782	1.09925	0.890223	0.856635	0.655135	0.754029	1.08293	2.71698	3.4483	2.5865
TraesCS3D02G429700	1.13975	0.997381	1.09524	2.43586	2.2927	2.16509	2.50531	2.59548	2.07229	5.27969	5.11156	5.03665
TraesCS3A02G437400	0.115779	0.0232738	0.204458	0.738786	0.69739	0.67028	1.27421	0.695523	1.14535	0.741336	1.51085	1.71361
TraesCS1B02G194900	25.8298	22.6425	23.277	21.7595	21.081	22.4015	36.1016	40.1496	41.2558	55.1896	54.359	56.2176
TraesCS1D02G189600	8.55796	9.16699	10.5943	6.24309	6.30319	5.21172	4.91597	4.85481	6.84761	19.5981	20.7859	20.0369
TraesCS1A02G187000	15.3679	16.3881	17.048	15.5409	15.0029	14.208	21.5725	23.5056	21.9798	40.4466	40.5857	40.4935
TraesCS5B02G192400	0.608185	0.594166	0.410808	1.62205	1.14828	1.35997	1.18808	1.95648	1.70649	4.18945	3.96614	3.54434
TraesCS5D02G200100	3.66995	4.62591	3.62158	5.04796	5.67951	5.12004	11.9845	10.8317	7.79125	14.4809	13.8528	15.2935
TraesCS5A02G190900	0.733269	0.89604	0.63893	2.66714	2.89778	2.65319	3.68106	3.75582	3.52282	6.87891	6.56028	6.47957
TraesCS7A02G374900	0.135349	0.10713	0.168058	0.0658723	0.126507	0.25711	0.325847	0	0	0.0226737	0	0.140853
TraesCS7D02G348500	0	0	0	0	0	0	0	0	0	0	0	0
TraesCS7B02G252500	0	0	0	0	0	0	0	0	0	0	0	0
TraesCS7D02G030700	176.549	195.163	194.277	545.322	500.584	529.981	509.358	586.016	502.459	1158.86	1147.49	1239.67
TraesCS7A02G034300	44.7649	45.8791	46.8129	91.7859	84.3703	90.1874	109.917	117.242	118.51	217.737	220.726	226.876
TraesCS4A02G454800	79.1489	87.4912	90.8797	165.818	161.367	162.946	190.705	209.606	185.02	287.364	280.223	310.659
TraesCS4A02G454500	0	0	0	0	0	0	0	0	0	0	0	0
TraesCS4A02G454700	0.0692124	0.0782605	0.0343755	0	0	0	0	0	0	0	0	0
TraesCS7A02G034200	0	0	0	0	0	0	0	0	0	0	0	0
TraesCS3D02G490700	0	0	0	0	0	0	0	0	0	0	0	0
TraesCS7A02G034500	7.7873	8.06142	8.33554	3.02217	3.21575	3.00593	3.00147	1.86014	2.94319	1.66441	1.4783	1.6534
TraesCS4A02G455000	5.34977	6.63165	5.40595	8.10026	8.0128	8.31639	10.467	8.64149	10.9231	9.82498	11.0841	10.1724
TraesCS7D02G050800	6.26836	7.08454	6.91681	7.08782	5.76415	6.7414	1.87204	2.23066	1.95286	1.28047	0.894841	1.46636
TraesCS7D02G030800	9.94282	10.5922	11.441	10.8378	10.6117	10.8672	9.11884	8.23751	8.51686	5.06571	4.90999	4.3327
TraesCS2B02G609600	0.964325	1.29808	0.718422	1.07274	1.01936	0.809998	0.6791	0.698264	0.572996	19.9084	18.5033	19.4815
TraesCS2A02G578200	0.241869	0.0911626	0.220235	0.294285	0.584009	0.634488	0.388193	0.299678	0.326276	13.533	11.7113	11.4666
TraesCS2D02G589400	6.84112	6.01948	5.37812	3.75134	3.44016	3.89394	8.71415	7.80478	7.59151	57.851	55.4141	52.2917
TraesCS2A02G577900	0.0248139	0.089785	0	0	0	0.107741	0	0	0.100421	1.29694	1.30375	0.619754
TraesCS2A02G578000	11.0052	10.1232	10.0824	6.69507	9.27845	8.57611	4.91018	6.10582	7.84919	3.26366	4.33782	3.27589
TraesCS2D02G589300	11.7411	12.3467	9.6036	8.14277	6.96168	9.37943	10.0446	8.97636	10.2208	28.5935	28.7466	30.3174
TraesCS2A02G578400	44.1502	41.9698	43.2581	34.5788	28.9856	30.745	40.3719	41.4556	45.2704	88.8201	88.4681	83.7781
TraesCS2D02G589600	41.967	41.2939	40.703	27.512	29.2312	28.7533	37.0061	38.6586	37.271	78.1385	77.1876	75.6103
TraesCS2B02G609400	74.2294	69.6656	70.762	58.1541	56.0557	57.7247	71.6133	75.3332	75.1005	140.391	136.995	140.339
TraesCS5D02G384400	0	0	0	0	0.0179532	0	0.105697	0	0	0.0257419	0	0
TraesCS5B02G376800	0	0	0	0	0	0	0	0	0	0	0	0
TraesCS5A02G374800	0.0806035	0.422893	0.0640529	0.392286	0.271216	0.0174989	0.288303	0.196105	0.260958	2.03081	1.81856	1.83421
TraesCS2D02G589500	3.6704	3.83457	3.38917	1.91213	2.15018	1.57123	3.23584	4.01777	4.56774	25.3914	26.7221	23.9939
TraesCS2A02G578300	0	0	0	0	0	0	0	0	0	0.138562	0	0
TraesCS2B02G609500	9.63562	9.97598	10.1883	5.60543	5.13632	4.67812	12.5307	14.4739	12.6428	52.1829	56.9141	54.9945
TraesCS3A02G376700	0	0	0.0175134	0.171615	0.164792	0.11483	1.0187	0.643432	0.80865	0.259912	0.926349	0.660527
TraesCS3D02G369600	0.2371	0.275755	0.201874	1.71441	1.04474	1.48907	3.47145	3.68546	4.15796	3.72225	3.76865	2.77291
TraesCS3B02G409200	0	0	0	0	0	0	0	0	0	0	0	0
TraesCS5A02G424100	60.6619	60.7836	60.9864	83.3986	79.7664	82.6968	117.54	117.411	123.138	76.5315	75.2512	79.0813
TraesCS5B02G426400	30.6739	28.1768	29.2402	56.9645	55.0386	55.0596	125.871	121.559	125.67	53.2697	54.9344	54.1996
TraesCS5D02G432700	122.531	125.875	124.748	115.023	109.733	115.056	239.313	242.657	236.199	221.823	225.793	223.044
TraesCS5A02G424000	0.0303431	0.137239	0	0.265816	0	0.230561	0.333943	0	0.0409323	3.41584	3.04785	3.53664
TraesCS5D02G432600	0.197984	0.25073	0.157331	0.944286	1.53591	1.46139	1.4163	1.81971	1.3888	32.0785	32.5224	33.1854
TraesCS5B02G426300	0.697892	0.441911	0.311958	2.05491	1.82644	2.31055	5.06445	6.2258	4.96611	36.9674	40.5505	36.9674
TraesCS3D02G512200	0.304861	0.746206	0.356269	0.418931	0.519605	0.389322	0.542746	1.09076	0.556399	0.360497	0.387972	0.0497661
TraesCS3B02G571200	0.0798351	0.187765	0.348933	0.543964	0.313403	0.50263	0.966492	0.474799	0.603098	0	0	0.0221552
TraesCS3B02G571100	0.162616	0.0490331	0	0.105524	0.0253321	0.088259	0.149139	0	0	0	0	0
TraesCS3D02G486200	22.382	21.9894	23.1039	21.0525	20.1694	22.5926	13.2543	13.056	11.214	14.6667	15.6903	16.3337
TraesCS3B02G540100	44.1438	39.4205	43.4752	28.8473	30.3243	30.6363	33.3319	35.6779	33.1676	18.9373	18.8957	20.7572
TraesCS3B02G540200	112.857	115.444	118.051	47.306	44.5136	47.2423	44.7423	47.6425	44.3953	101.349	93.658	102.063
TraesCS3D02G486100	48.7308	45.4537	47.2611	10.2083	9.71269	9.34088	7.63664	5.97137	7.02195	40.5436	44.9395	46.2683
TraesCS3B02G539800	0	0	0	0	0	0	0	0	0	0	0	0
TraesCS3B02G540700	0	0	0	0.0178374	0.0342565	0.119352	0.0252101	0.346772	0.791059	0	0	0
TraesCS3D02G485700	0.919876	0.745426	0.837598	0.223845	0.268682	0.332839	0.606369	0.802995	0.698003	0.821857	0.266533	0.585008
TraesCS4B02G274400	25.9371	25.0217	25.0442	20.0217	20.4891	18.7555	20.4279	15.3576	20.7448	12.2868	14.0769	14.1076
TraesCS3D02G487400	1.79458	1.955	1.32259	3.26819	2.66932	2.66017	3.84919	3.36459	4.03475	1.37061	2.53465	1.68683
TraesCS3B02G539000	0.809523	1.15073	0.919001	1.23823	1.15297	1.40178	1.5379	2.34469	2.80808	0.568278	0.744628	0.909305
TraesCS3D02G487200	12.2939	13.0987	12.7242	6.84662	7.07569	7.54571	3.71737	3.31782	4.34084	3.75959	3.34698	3.32011
TraesCS3A02G379200	1.3549	0.88752	1.32267	2.04645	2.64195	1.80038	2.95658	1.35773	1.51261	4.1325	4.07923	5.51037
TraesCS3D02G452100	2.51855	2.50051	2.4204	2.67073	3.27267	4.33418	4.28165	3.34884	3.34224	9.57701	9.80907	10.8817
TraesCS3A02G459500	5.95874	6.13305	5.02737	6.20904	5.87293	6.86206	6.43706	5.83407	5.64222	11.0571	12.13	12.5611
TraesCS3B02G499200	0.0229444	0.207551	0.0227914	0.156334	0.107227	0.298871	0.220951	0.124051	0.0309515	0.122997	0.283652	0.66857
TraesCS3B02G538500	0.244031	0.120407	0.13222	0	0.145148	0.0722438	0.0305193	0	0	1.3379	0.788497	1.38521
TraesCS3B02G538600	35.2377	36.3398	33.3263	21.8042	23.9489	22.8169	19.1372	19.6668	18.0412	41.6383	43.4286	47.2267
TraesCS3B02G538800	14.2054	13.9002	12.8048	7.09638	6.95787	7.02419	6.60022	5.60789	4.90587	10.2053	10.6066	10.4003
TraesCS3B02G538700	0	0	0	0	0	0.0269353	0	0	0	0	0	0
TraesCS3A02G488300	0	0	0.145181	0	0.0273215	0	0	0	0	0.391745	0.090343	0.730077
TraesCS3A02G488200	0.347802	0.430527	0.5455	0.249451	0.222424	0.357666	0.0251826	0	0.296323	7.80124	8.91064	8.58512
TraesCS3B02G536100	11.5281	11.4258	11.6567	8.36974	7.21557	7.42592	4.4804	3.12105	3.97498	96.97	100.311	99.5384
TraesCS3D02G483000	0.381566	0.452275	0.679625	1.28071	1.47575	0.942631	0.30771	0.302331	0.124244	21.6888	20.0682	21.908
TraesCS4A02G469800	0.915685	0.828313	0.90958	0.798458	0.838035	0.890431	0.603607	0.567271	0.30881	20.5551	20.1347	17.8938
TraesCS7A02G021900	1.4789	1.0889	0.81993	2.00863	1.51087	1.456	1.60868	0.952988	1.25268	34.7997	31.3576	30.2321
TraesCS7D02G019400	3.37384	2.9255	3.98592	5.01344	4.27299	3.55392	3.59774	5.12689	3.9857	50.2716	50.2549	51.246
TraesCS3B02G539100	124.277	122.678	126.151	199.063	190.358	203.774	274.389	276.217	267.237	255.026	262.672	254.265
TraesCS3D02G487300	439.967	424.814	434.824	271.269	255.523	264.215	240.481	247.392	242.381	116.209	118.818	116.461
TraesCSU02G234300	0.669054	0.521736	0.664593	1.50458	1.29382	1.42746	0.920412	1.46563	2.33416	2.34982	3.81475	1.40853
TraesCS7A02G083700	20.1269	18.6429	18.6461	11.2044	10.4368	12.4202	8.85017	8.54019	10.6929	33.2548	34.8306	36.4074
TraesCS7D02G078700	116.446	119.279	117.357	88.9512	89.8764	81.0617	61.4004	68.4302	64.4695	147.589	147.207	148.036
TraesCS3B02G539300	1.88558	1.47517	1.13056	2.8936	3.58831	3.13472	5.44502	4.33958	5.29347	4.59867	5.85393	7.0948
TraesCS3D02G486800	5.03965	6.68732	5.68702	9.79285	10.4945	12.2684	20.85	23.0901	21.095	8.81491	7.58747	7.04422
TraesCS3A02G487700	24.2478	24.0589	24.4989	24.9211	24.3694	23.4769	18.6176	21.003	18.0855	46.3953	50.8451	49.4901
TraesCS3B02G535300	15.5066	15.2896	14.9664	31.8251	29.6663	34.0174	38.2193	34.5792	42.1457	31.8768	28.9562	28.5469
TraesCS3D02G482700	9.32157	8.51529	8.41932	14.9612	14.4179	16.2255	20.968	19.2347	20.3872	30.6521	35.9979	29.5166
TraesCS3B02G535700	8.13437	7.96025	9.4758	7.55786	8.10408	8.10736	9.00318	11.0448	10.3247	17.6652	17.8555	16.3147
TraesCS1A02G258500	0.0654274	0.0236738	0.0649912	3.06962	2.61736	2.47153	5.6705	8.50742	6.61952	2.71819	1.88058	2.34223
TraesCS1B02G269100	1.32161	1.3297	1.37978	13.98	12.2393	13.8336	20.4818	21.8919	18.5196	4.37373	4.31388	5.63243
TraesCS1D02G257800	0.141291	0.244	0.344493	6.52636	5.16238	4.87996	9.84234	10.2432	10.3443	3.89035	4.94244	4.08139
TraesCS7D02G188400	7.05359	6.92093	7.6456	5.32264	5.6479	6.45949	3.63489	5.09306	5.20699	6.74333	5.78734	6.88616
TraesCS7A02G187300	0.0175386	0.317303	0.0696869	0.734079	0.459001	0.285571	0.241278	0.640063	0.0236593	1.24575	1.73459	1.5575
TraesCS5A02G143500	0.279705	0.13395	0.22881	0.75271	0.845812	1.00015	0.792211	1.15643	1.24293	5.20382	6.40726	7.57951
TraesCS5B02G142500	2.28294	2.1507	2.9022	2.92448	3.25045	3.20998	3.6288	3.90112	2.85624	20.3228	20.7651	22.6171
TraesCS5D02G148500	2.4732	2.05533	2.25698	2.54435	2.87545	2.9029	1.68735	2.03835	1.54609	10.4555	8.85562	9.23493
TraesCS5B02G244700	0	0	0	0	0	0.0271769	0	0	0	0	0	0.0347396
TraesCS5A02G247500	1.21263	0.594166	0.65246	0.688529	1.36954	1.28887	2.15476	0.921961	2.04476	1.2527	1.24927	0.911403
TraesCS5D02G254000	66.847	62.285	65.4041	61.8421	57.1001	56.542	74.6967	71.3782	71.6211	98.7802	98.5426	104.525
TraesCS2A02G306100	0.576572	0.664985	0.587046	0.771675	0.943085	0.813623	0.733697	1.36381	1.10834	1.06246	1.35876	0.980033
TraesCS2D02G304500	0.583238	0.473476	0.415944	0.451255	0.349447	0.519467	1.1521	0.384059	1.06921	0.881845	1.3866	1.49405
TraesCS2B02G322800	0.751186	0.734605	0.645343	0.948561	0.588256	0.793368	0.530665	1.01534	0.794235	1.41484	1.22357	1.12683
TraesCS5D02G563900	31.5062	31.5955	30.5503	30.9202	31.4724	31.0337	31.365	34.3492	35.6839	36.0506	35.411	35.342
TraesCS7B02G000300	26.3792	24.1145	22.9516	27.0628	26.5219	26.0849	35.7444	30.437	35.4068	25.5356	26.5411	24.5036
TraesCS5B02G572400	59.3805	60.3421	60.1391	42.2636	41.1652	44.7888	26.7253	26.3424	26.0104	49.706	49.0724	51.7806
TraesCS5B02G303200	29.8434	29.2167	27.7115	38.9617	42.4781	41.8704	62.4462	55.7256	57.6519	52.425	53.4247	51.5536
TraesCS5D02G309700	25.7898	27.5053	24.2954	47.3634	49.6953	48.5069	68.358	65.5378	68.9715	69.413	69.8517	65.968
TraesCS5A02G302900	26.2893	25.2037	24.0018	35.2578	35.7347	37.1532	58.9876	57.8778	62.6755	58.6354	62.1874	55.0099
TraesCS5D02G309800	22.5059	21.5264	21.7858	23.6696	22.9967	22.3276	19.0455	18.2035	21.3609	27.3497	28.5991	28.5657
TraesCS5B02G303300	25.5779	23.6598	20.6128	25.5594	23.1551	23.8686	12.5426	12.3233	14.1634	20.5395	20.9744	21.8383
TraesCS5A02G303000	21.9815	21.9585	20.1813	23.215	24.4196	24.2664	20.8687	20.8943	18.9969	24.678	21.7094	24.985
TraesCS7B02G370000	1.11192	1.26127	0.929189	2.06155	2.30951	1.16866	3.25356	2.83886	4.85701	4.28125	4.60935	3.77142
TraesCS7A02G468400	5.46658	5.63031	5.83537	6.56901	6.9724	7.17385	10.1981	10.6816	11.6668	9.37243	10.8072	10.2214
TraesCS7D02G456000	3.86129	3.02714	2.23314	5.16163	5.03661	4.78751	8.23942	7.26034	7.22287	4.11681	5.14483	4.23858
TraesCS5A02G051800	56.9108	53.7496	56.9005	55.6408	56.5175	53.1466	67.9758	64.7785	67.6048	62.5563	65.6722	64.879
TraesCS5D02G062900	58.5581	63.5062	56.4139	47.2388	47.3744	47.4403	43.6105	45.6727	44.3152	56.2911	56.8481	59.6079
TraesCS5B02G055900	43.5025	44.8296	46.9816	30.2191	29.8237	25.5246	29.2639	32.1975	29.2386	33.9016	31.2732	34.5953
TraesCS5B02G057800	30.7577	30.6484	29.8086	22.9737	21.3751	22.6791	18.5915	16.3709	21.2617	25.3516	24.8243	25.2531

## Sheet: Table S9
Table S9: Classification of DEGs under various salt concentrations.
100mM/CK		200mM/CK		300mM/CK
TraesCS4B02G200100	Lambda	TraesCS4A02G103800	Lambda	TraesCS4A02G103700	Lambda
TraesCS4D02G201300	Lambda	TraesCS4A02G103900	Lambda	TraesCS4A02G103900	Lambda
TraesCS1B02G097400	Phi	TraesCS4B02G199700	Lambda	TraesCS4B02G200100	Lambda
TraesCS1B02G113600	Phi	TraesCS4B02G200000	Lambda	TraesCS4D02G200700	Lambda
TraesCS1D02G081200	Phi	TraesCS4B02G200100	Lambda	TraesCS4D02G201100	Lambda
TraesCS1D02G094800	Phi	TraesCS4D02G201100	Lambda	TraesCS4D02G201200	Lambda
TraesCS5A02G502400	Phi	TraesCS4D02G201200	Lambda	TraesCS4D02G201300	Lambda
TraesCS5D02G418100	Phi	TraesCS4D02G201300	Lambda	TraesCS4B02G044400	MAPEG
TraesCS3A02G309000	Phi	TraesCSU02G231100	Lambda	TraesCS1A02G078800	Phi
TraesCS3A02G309100	Phi	TraesCSU02G231100	Lambda	TraesCS1A02G102700	Phi
TraesCS3D02G133100	Phi	TraesCS1A02G102700	Phi	TraesCS1A02G102900	Phi
TraesCS1A02G186200	Tau	TraesCS1B02G097200	Phi	TraesCS1B02G097400	Phi
TraesCS1A02G258500	Tau	TraesCS1B02G097400	Phi	TraesCS1B02G113500	Phi
TraesCS1B02G269100	Tau	TraesCS1B02G217700	Phi	TraesCS1B02G114400	Phi
TraesCS1D02G190200	Tau	TraesCS1D02G011800	Phi	TraesCS1D02G081200	Phi
TraesCS1D02G257800	Tau	TraesCS1D02G081200	Phi	TraesCS1D02G094700	Phi
TraesCS2D02G504900	Tau	TraesCS1D02G094800	Phi	TraesCS1D02G094800	Phi
TraesCS3A02G376700	Tau	TraesCS3A02G309000	Phi	TraesCS1D02G095000	Phi
TraesCS3A02G437400	Tau	TraesCS3A02G309100	Phi	TraesCS2A02G045400	Phi
TraesCS3D02G369600	Tau	TraesCS3D02G133200	Phi	TraesCS2D02G044100	Phi
TraesCS5D02G432600	Tau	TraesCS5A02G432600	Phi	TraesCS2D02G400000	Phi
TraesCS6D02G127800	Tau	TraesCS5A02G502400	Phi	TraesCS2D02G503200	Phi
TraesCS3D02G486100	Tau	TraesCS5B02G020900	Phi	TraesCS3B02G490600	Phi
		TraesCS5D02G418100	Phi	TraesCS3D02G133100	Phi
		TraesCS7B02G096300	Phi	TraesCS3D02G133200	Phi
		TraesCS1D02G011800	Phi	TraesCS4D02G327700	Phi
		TraesCS3A02G309000	Phi	TraesCS4D02G327900	Phi
		TraesCS3A02G309100	Phi	TraesCS5A02G024000	Phi
		TraesCS5B02G020900	Phi	TraesCS5A02G432600	Phi
		TraesCS1A02G186100	Tau	TraesCS5B02G435000	Phi
		TraesCS1A02G186200	Tau	TraesCS5D02G418100	Phi
		TraesCS1A02G186600	Tau	TraesCS5D02G440700	Phi
		TraesCS1A02G258500	Tau	TraesCS2D02G503200	Phi
		TraesCS1B02G021100	Tau	TraesCS4D02G327700	Phi
		TraesCS1B02G194600	Tau	TraesCS4D02G327900	Phi
		TraesCS1B02G269100	Tau	TraesCS1A02G017400	Tau
		TraesCS1D02G014500	Tau	TraesCS1A02G186100	Tau
		TraesCS1D02G190200	Tau	TraesCS1A02G186400	Tau
		TraesCS1D02G257800	Tau	TraesCS1A02G186800	Tau
		TraesCS2D02G504900	Tau	TraesCS1A02G258500	Tau
		TraesCS3A02G376700	Tau	TraesCS1D02G014500	Tau
		TraesCS3A02G437400	Tau	TraesCS1D02G189700	Tau
		TraesCS3A02G488200	Tau	TraesCS1D02G190100	Tau
		TraesCS3B02G538500	Tau	TraesCS1D02G190200	Tau
		TraesCS3B02G540700	Tau	TraesCS1D02G191100	Tau
		TraesCS3D02G369600	Tau	TraesCS1D02G257800	Tau
		TraesCS3D02G486100	Tau	TraesCS2A02G577900	Tau
		TraesCS4A02G429800	Tau	TraesCS2A02G578200	Tau
		TraesCS5A02G021700	Tau	TraesCS2B02G244100	Tau
		TraesCS5A02G143500	Tau	TraesCS2B02G574500	Tau
		TraesCS5A02G190900	Tau	TraesCS2B02G574600	Tau
		TraesCS5B02G426300	Tau	TraesCS2B02G609500	Tau
		TraesCS5D02G432600	Tau	TraesCS2B02G609600	Tau
		TraesCS6D02G127800	Tau	TraesCS2D02G545400	Tau
		TraesCS7A02G129500	Tau	TraesCS2D02G589400	Tau
		TraesCS1A02G186600	Tau	TraesCS2D02G589500	Tau
		TraesCS1B02G021100	Tau	TraesCS3A02G260800	Tau
		TraesCS1B02G194600	Tau	TraesCS3A02G376700	Tau
		TraesCS1D02G014500	Tau	TraesCS3A02G437400	Tau
		TraesCS3A02G488200	Tau	TraesCS3A02G488200	Tau
		TraesCS3B02G538500	Tau	TraesCS3B02G471600	Tau
		TraesCS3D02G486100	Tau	TraesCS3B02G536100	Tau
		TraesCS4A02G429800	Tau	TraesCS3B02G538500	Tau
		TraesCS7A02G129500	Tau	TraesCS3B02G571200	Tau
				TraesCS3D02G025800	Tau
				TraesCS3D02G261100	Tau
				TraesCS3D02G369600	Tau
				TraesCS3D02G429600	Tau
				TraesCS3D02G429700	Tau
				TraesCS3D02G429800	Tau
				TraesCS3D02G429900	Tau
				TraesCS3D02G483000	Tau
				TraesCS3D02G487200	Tau
				TraesCS3D02G487300	Tau
				TraesCS4A02G429800	Tau
				TraesCS4A02G435300	Tau
				TraesCS4A02G469800	Tau
				TraesCS4D02G225800	Tau
				TraesCS5A02G021700	Tau
				TraesCS5A02G143500	Tau
				TraesCS5A02G190900	Tau
				TraesCS5A02G374800	Tau
				TraesCS5A02G424000	Tau
				TraesCS5B02G142500	Tau
				TraesCS5B02G192400	Tau
				TraesCS5B02G426300	Tau
				TraesCS5D02G432600	Tau
				TraesCS6A02G139100	Tau
				TraesCS6B02G167600	Tau
				TraesCS6D02G127700	Tau
				TraesCS6D02G127800	Tau
				TraesCS7A02G021900	Tau
				TraesCS7A02G034300	Tau
				TraesCS7A02G034500	Tau
				TraesCS7A02G059900	Tau
				TraesCS7A02G132000	Tau
				TraesCS7A02G187300	Tau
				TraesCS7A02G477900	Tau
				TraesCS7D02G019400	Tau
				TraesCS7D02G030700	Tau
				TraesCS7D02G050800	Tau
				TraesCS7D02G465400	Tau
				TraesCSU02G184900	Tau
				TraesCS3B02G571200	Tau
				TraesCS3D02G487200	Tau
				TraesCS3D02G487300	Tau
				TraesCS4A02G429800	Tau
				TraesCS7A02G034500	Tau
				TraesCS7A02G059900	Tau
				TraesCS7A02G477900	Tau
				TraesCS7D02G050800	Tau
				TraesCS7D02G465400	Tau
